# 1     **Chemically Induced Senescence in Human Stem Cell-Derived Neurons Promotes** 2                   **Phenotypic Presentation of Neurodegeneration**

3     Ali Fathi<sup>1,6</sup>, Sakthikumar Mathivanan<sup>1,6</sup>, Linghai Kong<sup>1</sup>, Andrew J Petersen<sup>1</sup>, Cole R. K. Harder<sup>1</sup>,  
4     Jasper Block<sup>1</sup>, Julia Marie Miller<sup>1</sup>, Anita Bhattacharyya<sup>1,2</sup>, Daifeng Wang<sup>1</sup>, Su-Chun Zhang<sup>1,3,4,5\*</sup>

5         1- Waisman Center, School of Medicine and Public Health, University of Wisconsin-Madison, Madison  
6         WI 53705, USA

7         2- Department of Cell and Regenerative Biology, School of Medicine and Public Health, University of  
8         Wisconsin-Madison, Madison WI 53705, USA

9         3- Department of Neuroscience, School of Medicine and Public Health, University of Wisconsin,  
10         Madison, WI 53705, USA

11         4- Department of Neurology, School of Medicine and Public Health, University of Wisconsin, Madison,  
12         WI 53705, USA

13         5- Program in Neuroscience & Behavioral Disorders, Duke-NUS Medical School, Singapore,  
14         Singapore

15         6- These authors contribute equally.

16         \*Correspondence: suchun.zhang@wisc.edu

17

## 18     **Summary**

19     Modeling age-related neurodegenerative disorders with human stem cells is difficult due to the  
20     embryonic nature of stem cell derived neurons. We developed a chemical cocktail to induce  
21     senescence of iPSC-derived neurons to address this challenge. We first screened small  
22     molecules that induce embryonic fibroblasts to exhibit features characteristic of aged fibroblasts.  
23     We then optimized a cocktail of small molecules that induced senescence in fibroblasts and  
24     cortical neurons without causing DNA damage. The utility of the “senescence cocktail” was  
25     validated in motor neurons derived from ALS patient iPSCs which exhibited protein aggregation  
26     and axonal degeneration substantially earlier than those without cocktail treatment. Our  
27     “senescence cocktail” will likely enhance the manifestation of disease-related phenotypes in  
28     neurons derived from iPSCs, enabling the generation of reliable drug discovery platforms.

29     **Keywords:** Neural Differentiation, Cell Senescence, Disease Modeling, Neurodegeneration

30

## 31     **Introduction**

32     As global life expectancy increases, neurodegenerative disorders are predicted to cause a  
33     staggering burden to society. Substantial efforts have been made to develop effective therapies,  
34     but progress is slow and drugs developed based on animal studies have so far mostly failed in  
35     clinical trials <sup>1, 2</sup>. Poor clinical translatability of animal models necessitates additional models to  
36     test therapeutic strategies.

37     Human pluripotent stem cell (hPSC) derived neurons model early stages of neurodegeneration  
38     and have potential benefits in drug discovery and testing. An advantage of the hPSC model is the

39 ability to capture the human genetic background underlying diseases by establishing patient  
40 specific iPSCs, or by studying specific effects of disease proteins via introducing disease-related  
41 mutations into otherwise normal hPSCs<sup>3,4</sup>. However, the iPSC reprogramming process erases  
42 many of the aging marks found in somatic donor cells<sup>5,6,7,8</sup> and hPSC-derived neurons are similar  
43 to those in fetal development, based on transcriptional and functional profiling<sup>9,10,11</sup>. Thus,  
44 generating hPSC-derived neurons that resemble those in the adult and aging brain is critical for  
45 modeling neurodegenerative diseases using hPSCs.

46 One approach for modeling cellular senescence is trans-differentiation of fibroblasts or other aged  
47 somatic cells into neurons, avoiding the pluripotent stage and maintaining senescence markers  
48<sup>12,13</sup>. Indeed, a recent study showed that transdifferentiated neurons retain age related  
49 transcription profiles and manipulation of RANBP17 was able to reverse some of the age-related  
50 transcriptional changes in iPSC-derived neurons<sup>13</sup>. However, direct conversion of fibroblasts into  
51 neurons is relatively low throughput given the lack of expansion capacity of the resulting neurons.

52 Modulation of genes linked to premature aging disorders is another strategy to accelerate aging  
53 in stem cell models. The ectopic expression of progerin, a mutant form of nuclear lamina protein  
54 A (LMNA) that causes accelerated aging in progeria, in an iPSC model of Parkinson's disease  
55 can trigger age-related and degenerative phenotypes, including neuromelanin accumulation,  
56 dendrite degeneration, loss of tyrosine hydroxylase and accumulation of pathological aggregates  
57<sup>7</sup>. It remains to be determined how closely these approaches model physiological aging in normal  
58 neurons or pathological aging seen in late-onset diseases. Overexpression of premature aging  
59 genes introduces the challenge of distinguishing phenotypes related to the disease from those  
60 induced by foreign gene overexpression.

61 In the current study, we screened for chemicals/pathways that selectively trigger senescence  
62 phenotypes in primary neonatal fibroblasts and iPSC derived cortical neurons. To identify  
63 pathways important in neuronal senescence, we first used transdifferentiated neurons from aged  
64 and young fibroblasts and identified molecular markers for neuronal aging, including decreased  
65 expression of H3K9Me3, chromatin associated protein HP1 $\gamma$  and lamina associated polypeptide  
66 Lap2 $\beta$ . We then used these readouts for screening small molecules and developed a combination  
67 of molecules that induce senescence and protein aggregation in cortical neurons differentiated  
68 from hPSCs. We evaluated this chemical-induced senescence (CIS) approach in motor neurons  
69 derived from ALS (TARDBP mutant) patient iPSCs and confirmed that CIS promoted earlier and  
70 consistent manifestation of disease related phenotypes. Furthermore, using autophagy activator

71 molecules, we were able to mitigate cellular senescence (CS) phenotypes in the MNs. Thus, this  
72 CIS strategy enables more effective iPSC modeling of phenotypes in ALS.

73

## 74 **Results**

### 75 **Identification of small molecules that induce senescence in neonatal fibroblasts**

76 Primary human fibroblasts retain age-related markers depending on the age of the individual from  
77 which the cells are isolated <sup>14</sup>. These cells are thus appropriate reference for studying cellular  
78 senescence (CS). We compared neonatal fibroblasts with those from a 72-year old male and 62-  
79 year old female donors by examining the expression of age-related markers H3K9Me3, Lap2 $\beta$ ,  
80 and HP1 $\gamma$ . We found that neonatal fibroblasts expressed a higher level of H3K9Me3, Lap2 $\beta$ , and  
81 HP1 $\gamma$  than old fibroblasts (72 years) in our high content imaging platform. In addition, the old  
82 fibroblasts expressed the senescence associated  $\beta$ -Gal (Figure 1A, 1B, S1A-C). These findings  
83 are consistent with a previous observation <sup>7</sup>, indicating that these markers are reliable readouts  
84 for assessing CS.

85 We then looked for molecules that may induce senescence phenotypes in the neonatal  
86 fibroblasts, focusing on the known senescence associated pathways. We selected 25 small  
87 molecules known to affect pathways involved in CS <sup>15</sup>, including autophagy related molecules,  
88 Akt signaling, and inhibitors of mTOR, HDAC, ZMPSTE24, and Sirtuin signaling (Table S1). We  
89 examined the toxicity of these molecules in their minimum effective concentrations based on  
90 previous studies using calcein AM and ethidium homodimer (EthD-1) fluorescent dyes to  
91 distinguish live versus dead cells. None of the small molecules induced cell death beyond the  
92 DMSO control (5-10% cell death) at the final selected concentration (Figure S1D). By culturing  
93 the neonatal fibroblasts in the presence of the small molecules at an effective dose for 5  
94 consecutive days and examining the expression of the above CS markers, we found that more  
95 than half of the molecules (13 molecules,  $p \leq 0.001$ , Table S2) significantly decreased the  
96 expression of all three readouts (Figure 1C, 1D). Among the 13 molecules, seven also induced  
97 expression of  $\beta$ -Gal, another consensus marker for CS (Figure S1E, S1F). Thus, we identified a  
98 set of small molecules that induce senescence phenotypes in neonatal fibroblasts.

### 99 **Identifying small molecule cocktails that enhance neuronal senescence**

100 Epigenetic marks, including those associated with aging, are largely erased during  
101 reprogramming to iPSCs <sup>6, 16</sup>. Consequently, cells differentiated from iPSCs, including neurons,  
102 behave like those in embryonic development. In contrast, neurons directly converted from

103 fibroblasts by forced expression of transcription factors retain much of the age-related signatures  
104 in their parental somatic cells<sup>13</sup>. To validate this phenomenon and to establish CS readouts in  
105 neurons, we reprogrammed both young and old human fibroblasts to neurons using a combination  
106 of gene overexpression and small molecules<sup>13</sup>. Both neonatal and aged fibroblasts were  
107 transduced with lentiviral particles for Eto and XTP-Ngn2:2A:Ascl1 (N2A) and expanded in the  
108 presence of G418 and puromycin for at least three passages. Induced neurons (iNs), exhibiting  
109 polarized morphology and expressing neuronal proteins like  $\beta$ -III tubulin (Figure 2A), appeared at  
110 the 2<sup>nd</sup> week in the neonatal fibroblast group and mostly at the 3<sup>rd</sup> week for the old fibroblast  
111 group. At the end of 3 weeks of DOX treatment, the mean conversion rate for neonatal iNs was  
112 18.1% $\pm$ 3.5, whereas for aged iNs was 39% $\pm$ 4.4 (Figure 2B). Importantly, the iNs from old  
113 fibroblasts showed a lower intensity in the epigenetic mark H3K9Me3, Lamin B2, and Lap2 $\beta$  as  
114 well as the heterochromatin protein HP1 $\gamma$  (Figure 2C). Besides the above markers, the  
115 morphology and size of a cell and nucleus may serve as a sign of CS<sup>17</sup>. We also noticed that  
116 neonatal iNs had a lower Hoechst (nuclear) intensity (Figure 2D) and a smaller nucleus area  
117 compared to their aged counterparts (Figure 2E), while there were no differences in the nuclear  
118 roundness and ratio between young iNs and aged iNs (Figure 2F, 2G). Our results confirmed that  
119 the iNs from aged fibroblasts retain the age-related signatures of their parental cells, setting a  
120 reference for us to examine the effects of small molecules on CS in embryonic neurons.

121 Neurons differentiated from ESCs and iPSCs resemble those during embryonic development. To  
122 identify small molecules that induce CS in the embryonic neurons, we generated cerebral cortical  
123 neurons from GFP-expressing hESCs (H9, WA09) according to an established protocol<sup>18</sup> (Figure  
124 S2). The ESC-derived cortical progenitors at day 14 expressed SOX1 (86.7%) and OTX2 (87%),  
125 markers of cortical progenitors (Figure S2B). When differentiated to mature neurons in the  
126 presence of compound E that inhibits notch signaling and MEK inhibitor PD0325901 at day 21,  
127 the majority of the cells expressed neuronal markers (MAP-2b 95%, TUBB3 95%) (Figure S2C).  
128 Following treatment of the neuronal cultures with small molecules for 4 consecutive days, we  
129 assayed for CS hallmarks (Figure S2D). The criteria for positive molecules were defined by  
130 expression of CS markers without inducing obvious DNA damage and cell death. By using three  
131 different concentrations based on the half maximal inhibitory concentrations (IC50s) for each  
132 small molecule, we identified a concentration that did not cause cell death (Figure S2E).  
133 Romidepsin, O151, SBI-0206965, Lopinavir, Sodium Butyrate, SCR-7 and Phosphoramidon had  
134 a significant impact on the expression of all three readouts H3K9Me3 (Mean $\pm$ SEM 1980 $\pm$ 22,  
135 1957 $\pm$ 19, 1632 $\pm$ 15, 1806 $\pm$ 27, 1990 $\pm$ 18, 1908 $\pm$ 23, 2037 $\pm$ 24, respectively, compared to 2183 $\pm$ 14  
136 in control), Lap2 $\beta$  (742 $\pm$ 6.4, 688 $\pm$ 6, 726 $\pm$ 5, 709 $\pm$ 8, 734 $\pm$ 5, 693 $\pm$ 7.7, 855 $\pm$ 7.5, respectively,

137 compared to  $789 \pm 4$  in control) and HP1 $\gamma$  ( $122 \pm 3.6$ ,  $98 \pm 0.5$ ,  $92 \pm 0.3$ ,  $96 \pm 0.64$ ,  $98 \pm 0.5$ ,  $99 \pm 0.5$ ,  
138  $95 \pm 0.5$ , respectively, compared to  $108 \pm 0.5$  in control) (Figure 3A, 3B, Table S2). Romidepsin  
139 induced a greater expression of HP1 $\gamma$  and Phosphoramidon induced greater Lap2 $\beta$  expression  
140 compared to the mean expression in the control group and were excluded from further  
141 experiments (Table S2). Among the remaining molecules, we found that neurons treated with  
142 Actinomycin D, Etoposide, Temozolomide and Hydroxy-urea showed higher H2A.x expression  
143 compared to the control group (Figure 3C, 3D), suggesting that these molecules caused  
144 significant DNA damage, promoting us to exclude these molecules from further screenings. Five  
145 molecules were selected for further analysis (O151, SBI-0206965, Lopinavir, Sodium Butyrate,  
146 SCR-7).

147 Our next step was to identify whether any combination of these five small molecules induces CS  
148 in neurons. We used the single molecule treatment with SBI-0206965 (autophagy inhibitor) as a  
149 reference since it had greater performance in modulating all three readouts during the initial  
150 screening. In this set of experiments, we used 50% of the concentration that we used for first set  
151 of experiments for molecules used in pairs and 70% reduction in triple combination to minimize  
152 cell toxicity. Results showed that most of the combinations had greater or similar effect to SBI  
153 (Figure 4A). Two of the combinations, SLO (SBI-0206965, Lopinavir, O151) and SSO (SBI-  
154 0206965, Sodium Butyrate, O151), had a greater mean difference in H3K9Me3 and Lap2 $\beta$   
155 expression compared with both DMSO (Control) and SBI-0206965 treated cells ( $p < 0.01$ ).

156  
157 To determine the minimum period of treatment needed to induce stable CS, differentiated cortical  
158 neurons at day 7 were treated with the SLO small molecules for different periods of time (treated  
159 at day 7, day 9, day 10, day 12 and day 13) and the cells were analyzed at day 14. Expression of  
160 H3K9Me3, HP1 $\gamma$  and Lap2 $\beta$  indicated that 2-4 days of continuous treatment with SLO molecules  
161 resulted in the maximum effect (Figure 4B-F). This experiment showed that expression of  
162 H3K9Me3 and Lap2 $\beta$  at 5- and 7-days post treatment recovered slightly but not to the normal  
163 condition. Reduction in HP1 $\gamma$  level was more persistent following SLO treatment and stayed at a  
164 lower level compared to the control cells even at 5- and 7-days post treatment (Figure 4B-F).  
165 Down regulation of all three senescence related proteins, H3K9Me3, HP1 $\gamma$  and Lap2 $\beta$ , was  
166 confirmed by western blot in the differentiated cortical neurons treated with SLO at day 7 (Figure  
167 4G, H).

168  
169 In addition to the CS phenotypes analyzed above, neuronal senescence is often accompanied by  
170 intracellular protein aggregation. We hence examined the effect of the top two small molecule

171 combinations on protein aggregation with MG-132-treated cells (a proteasome inhibitor) as a  
172 positive control. Proteostat™ staining revealed protein aggregates in cells treated with SSO or  
173 SLO comparable to MG-132 condition which were colocalized by Lamp2 positive  
174 autophagosomes (Tukey's multiple comparison MG-132  $p < 0.0001$ , SLO  $p < 0.004$ , SSO  $p < 0.035$ )  
175 (Figure 4I, J). As additional controls, Proteostat™ and Lamp2 staining revealed more prominent  
176 protein aggregation in aged iNs than in the young iNs ( $p < 0.003$ ). Our results show that the CS  
177 phenotype in neurons induced by small molecules is associated with intracellular protein  
178 aggregation, similar to the phenomena preserved in aged iNs.

179  
180 Mitochondrial defects are associated with senescence in the directly reprogrammed neurons<sup>19</sup>.  
181 We found that SLO treated neurons showed a higher ROS level than the control cells, revealed  
182 by MitoSoX staining (Fig. S3A, C). It is, however, much lower than that in cells treated with FCCP,  
183 a potent uncoupler of mitochondrial oxidative phosphorylation and inducer of cell apoptosis. In  
184 parallel, JC-10 assay showed that the SLO treated cortical neurons had a lower mitochondrial  
185 membrane potential than untreated controls, but again not as low as that in the FCCP treated  
186 cells (Fig. S3B, D). Accompanying with the functional changes was morphological alterations in  
187 the mitochondria when neurons treated with SLO, including lower branches and smaller area for  
188 SLO treated cells, though statistically insignificant (Fig. S3E-G). Thus, SLO-induced CS is  
189 accompanied by functional alterations in mitochondria, including depolarization and over  
190 production of ROS.

191

## 192 **SLO-treated neurons express CS-related transcripts and pathways**

193 To define CS-related changes in SLO-treated neurons, we performed RNA-seq analysis on  
194 cortical neurons treated with or without SLO. Principal component analysis based on overall gene  
195 expression showed high similarity (clustering) among independently cultured neurons treated with  
196 SLO or among those without SLO treatment (controls), but a high degree of separation between  
197 the SLO-treated and the control groups (Figure 5A). When comparing our RNAseq data with iNs  
198 from both young (<30 yrs, 8 samples) and aged (>60 yrs, 9 samples)<sup>13</sup>, we found that our cortical  
199 neurons are similar to young iNs, whereas the SLO treated neurons clustered with aged iNs  
200 (Figure 5A). We further compared our SLO treated cells to the aged (>60 yr, N=205) and young  
201 (<30yr, N=128) brain samples available in PsychENCODE<sup>20</sup>. The SLO treated samples (orange  
202 dots) are clustered with the PsychENCODE aged group (red dots), whereas the CTRL samples  
203 (blue dots) are clustered with the PsychENCODE young group (green dots). Note that we used  
204 PC2 and PC3 for showing clustering since the first PC (PC1) likely captures potential major



205 confounding factors between our study and PsychENCODE (Figure 5B). Together, our results  
206 indicate that the SLO-treated neurons resemble those in the aged human brain and those directly  
207 converted from aged fibroblasts.

208 We then looked at the human aging scores ( $-\log_{10}(\text{p-value})$ ) for the genes that are associated with  
209 aging, see RNAseq in methods) of cortical neurons treated with SLO. We found that the up-  
210 regulated genes in SLO-treated cells have higher human aging scores in the PsychENCODE  
211 aged group than the down-regulated genes (Figure 5C, t.test  $p < 2.2e-16$ ). Similarly, the down-  
212 regulated genes have significantly higher human aging scores in the PsychENCODE young group  
213 than the aged genes (Fig. 5D, t.test  $p < 2.2e-16$ ). These results suggest that our SLO-treated  
214 neurons have a similar gene expression dynamic to that in the aged human brain in  
215 PsychENCODE.

216  
217 Comparison between SLO treated neurons and DMSO control neurons resulted in **271**  
218 differentially expressed genes (DEGs) ( $\text{FDR} < 0.05$ ,  $0.6 \leq \log_{2}\text{FC} \leq -0.6$ ) with **190** genes down-  
219 regulated and **81** genes up-regulated upon SLO treatment (Figure 5E, Table S3). These DEGs  
220 are also present in the gene list that are significantly modulated by age in PsychENCODE (Table  
221 S4). In our SLO DEG list, GABA receptors are among the most down-regulated genes whereas  
222 histone variants are up-regulated (Figure 5F). Pathway analysis for DEGs in the SLO treated  
223 neurons revealed that neurotransmitter receptor signaling and GPCR signaling are down-  
224 regulated whereas pathways in the histone modification (especially histone variants) are up-  
225 regulated (Figure 5G).

226  
227 Premature aging syndromes that are associated with mutations in LMNA or WRN genes resemble  
228 normal aging in terms of gene expression<sup>21,22</sup>. Over-expression of mutant Lamin A/C (Progerin)  
229 in normal neurons causes aging phenotypes<sup>7</sup>. Interestingly, the SLO-treated neurons exhibited  
230 an upregulated pathway (WP4320) that shares 11 genes (30% of total genes in the pathway)  
231 involved in Hutchinson-Gilford Progeria Syndrome (Figure 5G). They included histone variants,  
232 several of which are involved in the histone modification pathway (WP2369). Other transcripts  
233 that are up regulated in SLO-treated cells included insulin receptor substrate 1 and 2 (IRS1 and  
234 IRS2), pro-apoptotic genes (FOXO3, BAD and BCL2L11), nutrients sensing transcripts  
235 (EIF4EBP1, TSC2, EEF2) and downstream kinase molecules (PIK3R2, ELK1, PTPRF, MAPK7,  
236 AKT1, MAP2K2, PLCG1, CRTC1 and JUN), and other transcripts (SHC2, RAB3A, DOCK3,  
237 RELA, NCK2, RACK1, SH2B1, LINGO1, STAT5B, EGR1, SQSTM1). Other down regulated

238 transcripts in SLO treated cells included AMPA and NMDA receptors (GRIA1, GRIA2, GRIA3,  
239 GRIN2B), both trkB and trkC receptors (NTRK2, NTRK3) and their downstream calcium signaling  
240 molecules (NFATC4, CAMK2A, CAMK4), MAPK responsive transcripts (MAP2K1, KIDINS220,  
241 PRKAA2, PPP2CA) and other transcripts (GABRB3, MEF2C, SHC3, RASGRF1, PIK3R1,  
242 CDC42, CDH2, CNR1, SPP1, EIF4E, NSF, PTPN11, DLG1, APC). The transcriptome data  
243 suggest that the SLO-treated neurons resemble those from aged human cortex and premature  
244 aging samples.

245

### 246 **Induction of CS accelerates disease phenotype manifestation in ALS MNs**

247 Neurodegenerative diseases such as amyotrophic lateral sclerosis (ALS) usually manifest  
248 symptoms after the 5<sup>th</sup> decade of life. We hypothesized that induction of CS in ALS iPSC-derived  
249 neurons would accelerate the presentation of disease phenotypes. We used the *TARDBP* mutant  
250 (298S) iPSC line generated from an ALS patient and its isogenic cell line (298G) produced by  
251 correcting the mutation using CRISPR for investigation of the ALS disease phenotype (Figure  
252 S4). Both mutant and corrected iPSCs were differentiated to spinal motor-neurons (MNs) using  
253 our previously published protocol<sup>3,23</sup> (Figure 6A) and the MNs were treated with the SLO cocktail  
254 for 4 days. As expected, addition of the small molecules at day 25 and assayed at day 28 did not  
255 significantly alter the percentage of cells expressing cleaved caspase 3 (Figure 6B), indicating no  
256 obvious cytotoxicity for SLO and SSO treatments (control=26.9±1.3, SLO=25±2.4,  
257 SSO=24.7±4.9,) whereas we found significant number of caspase 3 positive cells in MG132  
258 treated neurons (MG132=36.92±1.33).

259

260 We then examined if the MNs treated with SLO display CS-like phenotypes as we observed in  
261 fibroblasts and cortical neurons. Both 298G and 298S MNs showed a reduction in the expression  
262 of H3K9Me3 and Lap2 $\beta$  following SLO treatment (Figure 6C), indicating that SLO treatment  
263 induces CS. Both cell lines responded at the same level to the SLO chemicals and difference in  
264 H3K9Me3 and lap2 $\beta$  signal intensity was not significant (Figure 6C). We then asked if induction  
265 of CS accelerates neuronal degeneration. By day 32, the 298S MNs treated with SLO showed  
266 axonal swellings, a sign of axonal degeneration whereas 298G MNs showed relatively intact  
267 neurites (Figure 6D). Proteostat staining was increased in SLO-treated cells, especially in the  
268 298S MNs. ALS MNs, when treated with SLO, were positive for phosphor-TDP43 and Proteostat  
269 (Figure 6E, S5A). Immunofluorescence for phosphorylated neurofilament, a marker for axonal  
270 degeneration and turnover, was also significantly increased in the SLO-treated 298S than in non-



271 SLO-treated 298S and SLO-treated 298G MNs. Under higher magnification Proteostat positive  
272 aggregates were observed along the axons and were positive for both  $\alpha$ -internexin and  
273 phosphorylated neurofilament (Figure 6E, S5A). Quantification of the aggregates showed a  
274 significant increase in p-NFH aggregates ( $1.22 \pm 0.31$  in 298G compare to  $4.26 \pm 0.92$  in 298S) and  
275 Proteostat-positive aggregates ( $4.49 \pm 0.38$  in G298G compare to  $7.86 \pm 1.06$  in G298S) in 298S  
276 ALS mutant MNs than the 298G isogenic control MNs that were treated with SLO (Figure 6F, G).  
277 Following SLO treatment we detected TDP43 signal permeation from nucleus to the cytoplasm  
278 area (Figure S5A), and ALS MNs treated with SLO had significantly more p-TDP43 signal  
279 compared to the isogenic control and cells that are not treated with SLO (Figure 6H, S5A).  
280 Interestingly, neurite swelling contained p-TDP43 proteins that are co-labeled with Proteostat and  
281 other neurofilaments (Figure S5A and 6E).

282  
283 One of the hallmarks of the neurodegeneration is mitochondrial deficit. Assay with JC-10 staining  
284 showed that ALS-MNs had a lower mitochondrial membrane potential (MMP) than the isogenic  
285 control MNs. Treatment with SLO lowered the membrane potential for control neurons but not  
286 further for the ALS-MN (Fig 6I). Morphological analysis with Mitotracker staining showed that  
287 isogenic control MNs treated with SLO had shorter and smaller mitochondria than those without  
288 SLO treatment, but SLO treatment had no further effect on ALS MNs (Figure S5B,C). Giving that  
289 mitochondrial DNA is generally not reprogrammed during iPSC generation, these results indicate  
290 that the mitochondrial phenotypes are present in ALS-iPSC-derived MNs and SLO treatment does  
291 not change the mitochondrial phenotypes beyond what it was in ALS-MNs, suggesting that  
292 senescence- or disease-related mitochondrial phenotypes are retained during reprogramming.

293

#### 294 **Autophagy Induction clears up protein aggregation and improves neurite health**

295 The fast and consistent presentation of disease relevant phenotypes in SLO-induced cultures  
296 makes them amenable for testing therapeutic agents. We examined the effects of molecules on  
297 protein aggregation and neurite swelling in the SLO-treated ALS motor neuron cultures, including  
298 the current ALS medication Edaravone, autophagy activators STF-62247, SMER28,  
299 Flubendazole, and the peptide Tat-Becn1, and KU-60019, a molecule identified from our initial  
300 cell toxicity screening as neuroprotective. In addition, Amiodarone was used as an unrelated hit.  
301 MNs from both ALS (298S) and isogenic (298G) iPSCs at day 28 post differentiation were treated  
302 with SLO and then the compounds were added separately 24 hours later, and cells were analyzed  
303 at day 32 (Figure 7A). SMER28 and Tat-Becn1 decreased proteostat positive aggregates in both  
304 ALS ( $37\% \pm 14$  and  $62.5\% \pm 5.5$ ) and isogenic MNs ( $38\% \pm 11.7$ ,  $66.9\% \pm 5$  for 298G) as compared

305 to SLO treated control. Edaravone and KU-60019 reduced the level of Proteostat, more so on  
306 ALS cells (to 26%±6 and 17%±0.7) than the isogenic cells (64%±10.4, 30%±13.6 for 298G). MNs  
307 treated with STF-62247 and Flubendazole showed more aggregates in 298G cells compared to  
308 the SLO treated cells (179%±29, 143±26.8) and no improvement in 298S cells. Amiodarone did  
309 not improve protein aggregation (Figure 7B).

310  
311 Neurite swelling is one of the obvious morphological changes in ALS MNs following SLO  
312 treatment. SMER28 and EDARAVONE significantly reduced the number of swellings to the level  
313 of isogenic control cells (Figure 7C). However, KU-60019 treatment did not improved the swelling  
314 phenotype to the normal level (Figure 7C) despite significant reduction in protein aggregation  
315 (Figure 7B). Other molecules did not show significant improvement in 298S MNs or even induced  
316 more swellings in the 298G control cells (Figure 7C). Thus, EDARAVONE and SMER28 can  
317 reduce both protein aggregation and neurite swellings in 298S TDP43 mutant cells and were  
318 beneficial for MN health in our CS culture system.

319

## 320 **Discussion**

321 Most neurodegenerative diseases are concurrent with aging<sup>24, 25, 26, 27</sup>. Hence, recapitulating CS  
322 in stem cell derived neurons could expand the capacity of the iPSC model to study disease  
323 mechanisms<sup>28, 29</sup>. By using H3K9Me3, HP1 $\gamma$  and Lap2 $\beta$  as readouts and screening for  
324 chemicals/pathways that induce CS in neonatal fibroblasts and iPSC derived cortical neurons, we  
325 developed cocktails of small molecules that induce CS in the cortical neurons. This chemically  
326 induced senescence (CIS) approach was validated in motor neurons derived from ALS patient  
327 iPSCs. Importantly, CIS enhanced the presentation of disease related phenotypes. This CIS  
328 strategy will likely enable more effective iPSC-based modeling of age-related degenerative  
329 diseases and enable better therapeutic target design.

330 Cellular senescence across different cell types shares different features including mitochondrial  
331 dysfunction, DNA damage, P16 expression changes and epigenetic marks for gene silencing<sup>19,</sup>  
332<sup>30, 31, 32</sup>. These alterations ultimately result in age-related changes at the cellular level, including  
333 changes in cell size, shape and metabolism, proliferation arrest, and telomere erosion<sup>15, 33, 34</sup>. In  
334 mitotic cells like fibroblasts, expression of P16 accompanies proliferation arrest and induces  
335 senescence<sup>35, 36</sup>. P16 activation by Palbociclib in our study is one of the most efficient pathways  
336 in CS by blocking CDK4/6 and proliferation of fibroblasts, causing senescence. Other pathways  
337 in our study with fibroblasts are related to the DNA repair, DNA synthesis and DNA alkylation

338 pathways; all related to cell division and telomere attrition. Surprisingly none of the sirtuin  
339 inhibitors induced senescence in fibroblasts or neurons despite their effects on aging<sup>32, 37</sup>. This  
340 may reflect differences between cell types or insufficient treatment with inhibitors.

341 In post-mitotic cells like neurons, protein quality control, including proteasome and autophagy  
342 processing, is more important in CS progression<sup>38, 39, 40</sup>. This is reflected in our study showing the  
343 powerful CS-inducing effect of autophagy inhibitors (SBI-0206965). Faulty autophagosomes  
344 could not clear impaired mitochondria and unfolded protein debris, leading to lack of mitochondrial  
345 turnover and producing more oxidative stress<sup>41, 42</sup>. Oxidative stress generates ROS and accounts  
346 for higher DNA mutations, which is ultimately related to CS<sup>16, 43</sup>. Similarly, we found that inhibition  
347 of DNA glycosylase (*OGG1*), important in detecting and removing oxidized nucleotides in genomic  
348 DNA, exacerbates CS phenotype in neurons but not in fibroblasts. Two of three small molecules  
349 in SLO, DNA glycosylase inhibitor (O151) and HIV protease inhibitor (Lopinavir), modulate CS  
350 phenotypes in neurons, indicating that base excision repair (BER) pathway is critical for neuronal  
351 health and is linked to neurodegenerative diseases<sup>44, 45</sup>. Lopinavir also inhibits ZMPSTE24<sup>46, 47</sup>,  
352 thereby blocking lamin A biogenesis and leading to an accumulation of prelamin A. ZMPSTE24  
353 deficiency in humans causes an accumulation of prelamin A and leads to lipodystrophy and  
354 premature aging<sup>48, 49, 50</sup>, which perhaps causes senescence phenotype in our cultured neurons.  
355 We used three different endopeptidase inhibitors Phosphoramidone (a general  
356 metalloendopeptidase), Lopinavir (zinc metalloprotease inhibitor) and GGTI-298 (a  
357 geranylgeranyltransferase I (GGTase I) inhibitor), and only Lopinavir induced senescence in  
358 cortical neurons in all three markers. Interestingly, none of the endopeptidase inhibitors induced  
359 senescence phenotype in fibroblasts, indicating that neurons are more sensitive to the activity of  
360 endopeptidase, perhaps for the processing of other lamin proteins rather than just for Lamin A<sup>51</sup>.  
361<sup>52</sup>.

362 Information on CS derives largely from studies on mitotic cells. Transcriptomic analysis revealed  
363 that the gene expression pattern of our SLO-treated neurons resembles that of iNs and aged  
364 brain. In particular, our in-vitro neuronal senescence system, despite the lack of many other cell  
365 types that are normally present in the human brain, resembles the aging cortex samples as  
366 indicated by the substantial overlap of age-related transcripts between our CIS neurons and aged  
367 human brain tissues<sup>20</sup>. These transcription profiles may be more specific to CS in neurons. For  
368 example, transcripts that are involved in neurexin/neurologin complexes at synaptic membrane  
369 assembly and neurotransmitter release from GABA, glutamate and cholinergic systems are  
370 common between aged brains and SLO induced senescence. Neurexin expression declines with

371 age and causes decrease in synaptic density and cognitive decline <sup>53, 54</sup>. Other transcripts like  
372 CREB Regulated Transcription Coactivator 1 (CRTC1) transcription coactivator of CREB1 <sup>55</sup>,  
373 which show significant change in our SLO-treated cortical neurons, also contribute to brain aging  
374 and neuronal senescence. Some of other molecules such as p62 (SQSTM1) have multiple  
375 function and contribute to neurodegeneration by binding to the ubiquitin molecules that are  
376 marked for degradation and by binding to autophagy molecule LC3-II <sup>56</sup>. In addition, our CIS  
377 neurons share several histone variants with the progerin effect in the progeria syndrome. Histone  
378 variants are one of the most affected transcripts during CIS in the cortical neurons. Histone variant  
379 exchange, by regulating expression of age related genes <sup>57</sup> and/or chromatin organization <sup>58</sup>, is  
380 one of the mechanisms behind CS and aging. Thus, our CIS recapitulates aspects of premature  
381 aging effects primarily at the epigenetic level.

382

383 A major driving force behind the development of CIS is to enable effective and reliable modeling  
384 of age-related diseases using human stem cells. We and others have shown that some aspects  
385 of neurodegenerative changes such as ALS may be recapitulated by strictly controlling the  
386 neuronal differentiation process, prolonged maturation, and undergoing stress (including culturing  
387 under a basal condition without trophic factors and medium changes) <sup>3, 4, 59</sup>. Such manipulations  
388 over a long term adds variables to the system, making stem cell-based disease modeling more  
389 difficult. MNs from patients with TARDBP mutations have increased levels of soluble and  
390 detergent-resistant TDP-43 and show decreased cell survival, suggesting that this model is  
391 representative for ALS pathology <sup>60, 61</sup>. However, neither increase in insoluble TDP43 nor its mis-  
392 localization phenotype is repeated in a recent study <sup>62</sup>. Similarly, dopamine neurons from  
393 Parkinson's disease (PD) iPSCs exhibited mitochondrial dysfunction and oxidative stress,  
394 changes in neurite growth and morphology, synaptic connectivity and lysosomal dysfunction <sup>63</sup>,  
395 <sup>64, 65, 66</sup>, but hallmark pathology like protein aggregation and Lewy body formation are rarely  
396 observed <sup>64, 65, 66, 67</sup>. These inconsistencies may be due to the different protocols used and the  
397 long-term cultures that are necessary to mature the stem cell derived neurons. The current CIS  
398 approach enables an early and consistent presentation of disease relevant phenotypes, including  
399 protein aggregation and axonal degeneration in TDP43 mutant MNs. Since the cocktails induce  
400 CS in different neuronal types, it is likely that the CIS approach may promote phenotypic  
401 presentation in other age-related diseases using iPSCs.

402

403 Our CIS method induces CS in a short period (after 2-4 days of treatment) without a need of  
404 genetic manipulation. It promotes reliable and consistent presentation of disease relevant  
405 phenotypes and it is not specific to any particular disease. The cocktails were developed by  
406 screening a relatively small pool of molecules, suggesting that other molecules, especially those  
407 affecting similar pathways, may also induce CS. Since our CIS method enables faster and  
408 consistent presentation of disease phenotypes from iPSC-derived neurons, it is also useful for  
409 establishment of drug testing platforms. As a proof of principle test, we found that the current ALS  
410 medication Edaravone and one of the many autophagy activators SMER28 but not others mitigate  
411 protein aggregation and neurite swelling in ALS iPSC-derived motor neurons, highlighting the  
412 utility of the system.

413

414 **Acknowledgements** We thank D. Moore lab for providing EtO and XTPNgn2: 2A:Ascl1 (N2A)  
415 vectors. We are grateful for technical support provided by K.M. Knobel and CMN Core at Waisman  
416 center. We would also like to thank R. Bradly, J.R. Jones, Y. Tao, M. Ayala for their comments  
417 and technical support. This study was supported in part by the ALS Association (20-IIP-556), the  
418 NIH-NIMH (MH100031), NIH-NINDS (NS086604, NS096282), NIH-NICHD (HD076892) and a  
419 core grant to the Waisman Center from the NIH-NICHD (U54 HD090256). S-C.Z. acknowledges  
420 the Steenbock professorship in Behavioral and Neural Sciences.

421

422

423 **Author Contributions** A.F.: Design and conception of the study, writing of manuscript,  
424 maintenance, directed differentiation, direct conversion of fibroblasts, establishing of high content  
425 imaging assays, small molecule screen. S.M: conduct the SLO response in cortical neurons,  
426 western blotting and JC10 MMP assay, writing of manuscript. L.K: Mitotracker assay and MMP  
427 assay. A.J.P.: gene targeting of TARDBP in human PS cells and characterization of iPSCs.  
428 C.R.K.H.: Immunostaining, high content imaging, data interpretation, editing the manuscript. J.B  
429 and J.M.M.: RNA sample preparations, immunostaining and cell toxicity assays. A.B.: design and  
430 interpretation of small molecule screen and follow-up experiment, writing of manuscript. D.W:  
431 RNAseq data analysis, comparing RNAseq data to iNs and brain data, writing of manuscript. S-  
432 C.Z.: design and conception of the study, data interpretation, writing of manuscript.

433

434 **Declaration of Interest** RNA-seq data have been deposited in the Gene Expression Omnibus  
435 (GEO) under accession GSE141028. The authors declare no competing financial interests.

436 Correspondence and requests for materials should be addressed to S-C.Z.  
437 ([suchun.zhang@wisc.edu](mailto:suchun.zhang@wisc.edu)). S-C.Z. is the co-founder of BrainXell, Inc.

438

## 439 **Legends**

### 440 **Figure 1. Identifying small molecules for inducing CS in human neonatal fibroblasts.**

441 Immunostaining for H3k9Me3, Lap2 $\beta$  and HP1 $\gamma$  proteins in both neonatal and aged fibroblasts  
442 Scale bar= 100 $\mu$ m (A). Frequency distribution analysis for different bins of signal intensity in high  
443 content imaging for H3k9Me3, Lap2 $\beta$  and HP1 $\gamma$  proteins in male neonatal and aged (72 years  
444 old) fibroblasts (B). Frequency distribution analysis for H3k9Me3, Lap2 $\beta$  and HP1 $\gamma$  protein  
445 expression in male neonatal fibroblasts treated with different small molecules; dashed red line is  
446 control and top seven molecules for each protein showed in the graph (C). Mean difference for  
447 signal intensity of all 25 small molecules depicted as mean  $\pm$  95% confidence intervals compared  
448 to the DMSO control group. The zero line means no difference compare to control and if difference  
449 in the mean does not touch the reference line then changes in expression are significant (D).

### 450 **Figure 2. Cellular senescence marks are preserved during direct reprogramming of** 451 **fibroblasts to neurons.**

452 Immunostaining for H3K9Me3, LaminB2, Lap2 $\beta$  and HP1 $\gamma$  co-stained with TUJ1 (red) in induced  
453 neurons (iNs) derived from fibroblasts from both neonatal and a 72 year-age donor Scale bar=  
454 100 $\mu$ m (A). Quantification results for percentage of TUJ1 positive neurons (B) and mean signal  
455 intensity for H3K9Me3, Lap2 $\beta$ , LaminB2 and HP1 $\gamma$  (C). Quantification results for Hoechst signal  
456 intensity (D), nucleus roundness (E), nucleus ratio (F) and nucleus area (G) for both young and  
457 aged iNs (ns: not significant, \*: p<0.05, \*\*: p<0.01, \*\*\*: p<0.001 unpaired t-test).

### 458 **Figure 3. Chemical induction of CS in hESC-derived cortical neurons.**

459 Frequency distribution analysis of high content imaging data for H3K9Me3, Lap2 $\beta$  and HP1 $\gamma$   
460 proteins in cortical neurons. The dashed red line is control and top seven molecules for each  
461 protein marker are shown in the graph (A). Mean difference for signal intensity of all 25 small  
462 molecules depicted as mean  $\pm$  95% confidence intervals compared to the DMSO control. The  
463 zero line means no difference compare to the control and if difference in the mean does not touch  
464 the reference line then changes in expression are significant (B). Confocal images of phospho-  
465 Histone H2A.X (Serine 139) in the H9-GFP cortical neurons treated with Etoposide, Actinomycin  
466 D and DMSO as control (Scale bar=50  $\mu$ m) (C). Quantification results for the number of positive



467 foci for phospho-Histone H2A.X (Serine 139) per nucleus in cortical neurons treated with different  
468 small molecules (D).

469 **Figure 4. Combinatorial effect of small molecules on CS in cortical neurons.**

470 Different combination of five most effective molecules (O151, SBI-0206965, Lopinavir, Sodium  
471 Butyrate, SCR-7) tested on cortical neurons and mean expression of H3K9Me3, Lap2 $\beta$  and HP1 $\gamma$   
472 in treatment groups compared to the DMSO control (A). A graph showing the period of SLO  
473 treatment on the expression of Lap2 $\beta$ , HP1 $\gamma$  and H3K9Me3 at day 14 after maturation (B) and  
474 high content imaging quantification of signal intensity for each marker after SLO treatment (C-E).  
475 Relative frequency distribution of different bins of signal intensity for Lap2 $\beta$ , HP1 $\gamma$  and H3K9Me3  
476 in cortical neurons treated with different small molecules (F). Representative images of Western  
477 blot for all three markers in cortical neurons treated at day 21 of differentiation (G) and their  
478 normalized protein expression to tubulin expression (H). Immunostaining images of H9-GFP  
479 cortical neurons treated with MG-132 (proteasome inhibitor), SLO (SBI-0206965, Lopinavir and  
480 O151) and SSO (SBI-0206965, Sodium Butyrate and O151) and stained for Lamp2A (Lysosome  
481 membrane associated protein) and Proteostat dye for detection of protein aggregation (Scale  
482 bar=100  $\mu$ m) (I), and quantification of positive area in neurons for Lamp2A and Proteostat (J).  
483 Young and aged iNs added for comparison with ESC-derived cortical neurons (I, J). (ns: not  
484 significant, \*: p<0.05, \*\*: p<0.01, \*\*\*: p<0.001 one-way ANOVA with Dunnett's multiple  
485 comparison test).

486 **Figure 5. RNAseq analysis on SLO treated cortical neurons.**

487 PCA plot for SLO and CTRL samples as well as induced neurons (iNs) converted from both aged  
488 (9 samples) and young (8 samples) fibroblasts (A) and the aged and young PsychENCODE  
489 samples (the old group (>60 years, N=205) and the young group (<30 years, N=128)) (B).  
490 Boxplots for human aging scores association between SLO neurons and brain samples for up  
491 regulated genes (C) and down regulated genes (D) in the aged brains. Smear plot represents  
492 each gene with a dot, the gray dots (below cut off line) are genes with no change relative to the  
493 contrast direction, red and green dots denote up- and down-regulated expression, respectively,  
494 at an adjusted p-value (FDR) significance threshold of 0.05. The light blue dots are transcripts  
495 with FDR<0.05 but have log expression change of less than 0.6. The X-axis (log<sub>2</sub> fold change) is  
496 the effect size, indicating how much expression has changed with SLO treatment (E). Heatmap  
497 clustering for 50 of the most differentially expressed genes with a p-value <0.05 and a log (2) fold-  
498 change greater or less than 2. The Z-score of given expression value is the number of standard-  
499 deviations away from the mean of all the expression values for that gene (F). All DEGs with a

500 FDR <0.05 and  $0.6 \leq \log FC \leq -0.6$  are selected and tested for over- or under-representation of  
501 pathways in the gene list. Any significantly enriched WikiPathway pathways are ordered from  
502 most to least significant based on the p-value (G).

503 **Figure 6. Phenotype presentation by SLO-treated motor-neurons derived from *TARDBP***  
504 **mutant iPSCs.**

505 Differentiation protocol used for generating MNs from TDP-43 298S mutant and 298G isogenic  
506 iPSCs (A). Immunostaining for cleaved caspase 3 and alpha internexin proteins in cultured MNs  
507 treated with SLO, SSO and MG-132, at day 28 (B). High content imaging for H3K9M3 and Lap2 $\beta$   
508 in both TDP43 298G isogenic control and 298S mutant following SLO treatment (Mean of SLO  
509 treatment compared to the control group with DMSO). Representative phase contrast image of  
510 MN cultures from both control and mutant ALS neurons treated with SLO (D). Immunostaining  
511 images for alpha-internexin, Proteostat, phosphorylated neurofilament heavy proteins in control  
512 and mutant MNs treated with SLO; right panel shows higher magnification images of control and  
513 mutant MNs treated with SLO (Scale bar=200  $\mu$ m, for higher magnification images scale bar=50  
514  $\mu$ m) (E). Quantification result for phosphorylated neurofilament aggregates (F) and Proteostat  
515 positive protein aggregations (G) and phosphorylated TDP43 protein (H) across all groups.  
516 Mitochondrial membrane potential (JC10 assay) evaluation of ALS-iPSC derived MNs treated  
517 with SLO compared to the healthy isogenic control cells and isogenic cells treated with FCCP (I).  
518 (ns: not significant, \*: p<0.05, \*\*: p<0.01, \*\*\*: p<0.001 one-way ANOVA with Dunnett's multiple  
519 comparison test, for JC10 assay data was quantified using 15,000 cells per group from two  
520 independent experiments. Statistical analysis was performed using One-way ANOVA, Tukey  
521 post-hoc test (\*\*\*\*- P<0.001)).

522 **Figure 7. Testing molecules that rescue the disease phenotype in ALS MNs.**

523 MNs from TDP-43 G298S mutant and G298G isogenic iPSCs treated with SLO to induce CS  
524 phenotypes and 24hr later candidate molecules SMER28, EDARAVONE and KU-60019 were  
525 added to the culture and cells stained with Proteostat dye for protein aggregation and alpha-  
526 Internexin for visualizing neurites (A). Quantification of immunostaining images positive for  
527 Proteostat (B) and neurite swellings (C). (Scale bar=100  $\mu$ m)

528

529

530

531 **Resource Availability**

532 **Lead Contact**

533 Further information and requests for sources should be directed to, and will be fulfilled by, the  
534 Lead Contact, Dr. Su-Chun Zhang ([suchun.zhang@wisc.edu](mailto:suchun.zhang@wisc.edu)).

535 **Materials Availability**

536 Plasmids and hESC/hiPSC lines generated in this study are available from the Lead Contact with  
537 a completed Materials Transfer Agreement.

538 **Data and Code Availability**

539 The published article includes all datasets generated or analyzed during this study. The datasets  
540 supporting this study are available from the lead contact, Dr. Su-Chun Zhang  
541 ([suchun.zhang@wisc.edu](mailto:suchun.zhang@wisc.edu)) upon request.

542 **Experimental Model and Subject Details**

543 **Neuronal differentiation from hPSCs**

544 Human embryonic stem cells (H9 or WA09, WiCell), H9-GFP (AAVS1-CAG-eGFP) cells and  
545 TARDBP mutant (G298S) and isogenic (control) induced pluripotent stem cells (iPSCs) were  
546 grown on Matrigel with Essential-8 medium (Stemcell Technologies) to 25% confluency. For  
547 cortical neuron differentiation, the fifth day cultures of hPSCs were treated with Accutase and the  
548 dissociated single cells were cultured in the neural differentiation medium (NDM)  
549 (DMEM/F12:Neurobasal 1:1 + 1X N2 Supplement + 1mM L-Glutamax) with the SMAD inhibitors  
550 SB431542 (Stemgent), DMH-1 (Tocris) (both at 2 $\mu$ M) and Rho kinase inhibitor (Tocris) (overnight)  
551 as spheres (embryoid bodies) for seven days. On day 8, neural spheres were patterned to dorsal  
552 forebrain (cerebral cortical) progenitors with the smoothed antagonist cyclopamine (Stemgent,  
553 2 $\mu$ M) and FGF2 (R&D, 10 ng/ml) for seven days. On day 14, neural progenitors were dissociated  
554 with Accutase to single cells and plated on Laminin coated plates in the maturation media  
555 (DMEM/F12/Neurobasal 50%/50%, 1x B27 Supplement, 1x Non-essential amino acids, 1x  
556 Glutamax) supplemented with Compound E (0.1  $\mu$ M, TOCRIS) for final maturation until assay  
557 time. For motor neuron differentiation, we used our previous published protocol with no further  
558 modification<sup>23</sup>. For SLO experiments and autophagy activation MNs treated four days after  
559 maturation (Day 25) with SLO molecules and autophagy activators and other molecules added  
560 24hr later and neurons cultured for another 3 days and analyzed at day 29.

561

## 562 **Direct Conversion of Human Fibroblasts into iNs**

563 Primary human dermal fibroblasts (WC-04-05-CO-DG, 72 year-old male, WC-60-07-CO-CMN  
564 neonatal male, WC-03-06-CO-DG, 62 year-old female, and WC-59-07-CO-CMN, neonatal  
565 female, neonatal fibroblasts from WiCell and aged fibroblasts from David Gamm's lab), were  
566 cultured in DMEM containing 15% tetracycline-free fetal bovine serum and 0.1% NEAA (Life  
567 Technologies), transduced with lentiviral particles for EtO and XTPNgn2: 2A:Ascl1 (N2A), and  
568 expanded in the presence of G418 (200 mg/ml; Life Technologies) and puromycin (1 mg/ml;  
569 Sigma Aldrich). For iN conversion, we followed the previously published protocol<sup>13</sup>. We used  
570 neuron conversion (NC) medium based on DMEM:F12/Neurobasal (1:1) for 3 weeks. NC  
571 contained the following supplements: N2 supplement, B27 supplement (both 1x; GIBCO),  
572 doxycycline (2 µg/ml; Sigma Aldrich), Laminin 1 µg/ml; (Life Technologies), dibutyryl cAMP (400  
573 µg/ml; Sigma Aldrich), human recombinant Noggin (150 ng/ml; R&D), LDN-193189 (0.5 µM;  
574 Cayman Chemicals) and A83-1 (0.5 µM; Stemgent), CHIR99021 (3 µM; LC Laboratories) and  
575 SB-431542 (10 µM; Cayman Chemicals). Medium was changed every third day. For further  
576 maturation, iNs were cultured in DMEM:F12/Neurobasal-based neural maturation media (NM)  
577 containing N2, B27, GDNF, BDNF (both 20 ng/ml; R&D), dibutyryl cAMP (400 µg/ml; Sigma  
578 Aldrich), doxycycline (2 µg/ml; Sigma-Aldrich), and laminin (1 µg/ml; Life Technologies).  
579 Converted neurons in 96 well plates were used for immunostaining without further purification.

580

## 581 **Immunofluorescent staining and microscopy**

582 Cells were fixed for 20 minutes with 4% paraformaldehyde in PBS at a room temperature.  
583 Samples were blocked with 4% donkey serum and 0.2% Tween20 for one hour. Primary  
584 antibodies were diluted in 4% donkey serum and 0.1% Tween20 and applied to samples overnight  
585 at 4°C. Samples were washed with PBS, incubated with fluorescein-conjugated secondary  
586 antibodies for one hour at room temperature, and counterstained with Hoechst for 20 minutes.  
587 Samples were imaged on a Nikon A1s confocal microscope (Nikon). For measuring neurite length  
588 and swellings, images were processed with Fiji software. First, a threshold was set for images to  
589 select all cell processes, then neurites were skeletonized. For analyzing the skeletonized neurites  
590 prune cycle method were used and parameters set to the shortest branch and end points  
591 eliminated to prune ends. Then total brunch length was calculated for labeled skeletons (total  
592 branch length in pixel/10,000=branch length in cm) and for aggregates per neurites length total  
593 number of aggregates were divided by the branch length.

594

595 The following primary antibodies were used:

596

| Antibody                                | Species | Catalog No. | Company                 | Dilution |
|-----------------------------------------|---------|-------------|-------------------------|----------|
| TDP43                                   | Rabbit  | 10782-2-AP  | Proteintech Group, Inc. | 1000     |
| phospho-TDP43                           | Rat     | MABN14      | MilliporeSigma          | 500      |
| P-SCG10                                 | Rabbit  | STJ91270    | St. John's Lab          | 300      |
| H3K9Me3 antibody                        | Rabbit  | ab176916    | abcam                   | 5000     |
| CHAT antibody                           | Goat    | AB144P      | Chemicon                | 1000     |
| HB9                                     | Mouse   | 81.5C10     | DSHB                    | 50       |
| TUBB3                                   | Rabbit  | PRB-435P    | Covance                 | 10,000   |
| MAP2                                    | Mouse   | M1406       | Sigma                   | 1000     |
| Lamp-2                                  | Mouse   | NBP2-22217  | Novus Biologicals       | 250      |
| Lamin B2 antibody                       | Mouse   | ab8983      | abcam                   | 500      |
| HP1 $\gamma$ antibody                   | Rabbit  | 2619        | Cell Signaling          | 1000     |
| HP1 $\gamma$ antibody                   | Mouse   | MABE656     | Millipore               | 500      |
| LAP2 $\beta$                            | Mouse   | 611000      | BD Biosciences          | 50       |
| Lamin A + C antibody                    | Rabbit  | ab133256    | abcam                   | 500      |
| H2A.X                                   | Mouse   | 05-636      | Upstate (EMD Millipore) | 500      |
| Alpha-Internexin                        | Rabbit  | AB40758     | abcam                   | 500      |
| Cleaved Caspase-3                       | Rabbit  | 9661S       | Cell signaling          | 300      |
| PhosphoDetect™<br>Anti- Neurofilament H | Mouse   | NE1022      | Millipore-Sigma         | 2000     |
| Proteostat                              | NA      | ENZ-51023   | Enzo                    | 1000     |
| SOX1                                    | Goat    | AF3369      | R&D systems             | 2000     |
| OTX2                                    | Goat    | AF1979      | R&D systems             | 2000     |

597

598

### 599 High-content imaging

600 For measuring cell population, fluorescence intensity, apoptosis, and intensity of H3K9Me3,  
 601 Lamin B2, Lap2 $\beta$ , and HP1 $\gamma$ , cells were plated in 96-well imaging plates (18000 cells per well,  
 602 CELL CARRIER) and treated with different molecules (supplementary table S1). After staining,  
 603 images were analyzed using the high-content cellular analysis system Operetta (Perkin Elmer).  
 604 A set of 60 fields was collected from each well (total of three wells per treatment) using the 40 $\times$   
 605 objective, resulting in over 10,000 cells being scored per well. In our analysis workflow, we first

606 identified the nuclei based on default protocol B and calculated the intensity and morphology  
607 properties for each nucleus by gating out nuclei with a roundness of below 0.75 and intensities  
608 above 1500 for removing extremely bright nuclei (dead cells). We then calculated the signal  
609 intensity for each protein in different channels separately. For quantification of H3K9Me3, Lamin  
610 B2, Lap2 $\beta$  intensity in directly reprogrammed neurons, we identified the cytoplasm based on the  
611  $\beta$ III-tubulin staining surrounding each selected nucleus and quantified the expression of markers  
612 in  $\beta$ III-tubulin positive population. All raw data were exported and analyzed with GraphPad Prism  
613 (GraphPad Software).

614

### 615 **RNA-seq procedure**

616 Cortical neurons differentiated for 7 days and then treated with SLO for 5 days were collected for  
617 RNAseq analysis. All experiments were run three times and RNA was extracted from all samples  
618 (3 biological replicates and 3 technical replicates) using the RNeasy Plus Mini kit (Qiagen)  
619 following manufacturer's instructions. RNA quality was assessed using an Agilent RNA PicoChip  
620 with all samples passing QC. Sample libraries were prepared using poly-A selection using an  
621 Illumina TruSeq RNAv2 kit following manufacturer's instructions. Prepared libraries were  
622 sequenced for 101-bp single-read and performed on an Illumina HiSeq to a read depth of >25  
623 million reads per sample by the DNA Sequencing Facility in the University of Wisconsin-Madison  
624 Biotechnology Center. FastQC was performed on all samples with every sample passing all  
625 quality control measurements.

626

### 627 **RNA-seq analysis**

628 Differentially expressed genes were identified with a glm function using the edgeR package. A  
629 subset of up to 50 of the most differentially expressed genes with a p-value <0.05 and a log fold-  
630 change greater or less than +/- 2 were selected according to their FDR rank in the list of DEGs<sup>23</sup>.  
631 Next, both samples and genes were clustered using Euclidean distances. For genes, an additional  
632 elbow function was applied to estimate the number of gene clusters present. Calculated  
633 relationships are depicted by dendrograms drawn at the top (samples) and to the left (genes) of  
634 the heatmap. The gradation of color is determined by a Z-score that is computed and scaled  
635 across rows of genes normalized by TMM. The Z-score of a given expression value is the number  
636 of standard-deviations away from the mean of all the expression values for that gene.

637

638 The empirical Bayes hierarchical modeling approach EBSeq was used to identify differentially  
639 expressed genes across 2 or more conditions. Median normalization technique of DESeq was



640 used to account for differences in sequencing depth. EBSeq calculates the posterior probability  
641 (PP) of a gene being in each expression pattern. Genes were declared differentially expressed at  
642 a false discovery rate controlled at  $100 \times (1 - \alpha) \%$  if the posterior probability of P1 (EE) is less than  
643  $1 - \alpha$ . Given this list of DE genes, the genes are further classified into each pattern and sorted by  
644 PP.

645 For quantifying the degrees to which genes are associated with aging in the human brain, we  
646 performed one-side t-tests for each gene to determine if it is significantly positively expressed  
647 (i.e., up-regulation) in the aged group (>60 years, N=205) and the young group (<30 years,  
648 N=128) of the healthy human brain tissue samples (DLPFC) in the PsychENCODE project<sup>20</sup>.  
649 Then, we used the value of  $-\log_{10}$  (t-test p value) of the gene as “human aging score” to quantify  
650 its degree of association with the corresponding group in the human brain. Finally, each gene has  
651 two human aging scores to quantify its association with (1) up-regulation in the aged group; (2)  
652 up-regulation in the young group.

653

### 654 **Principal component analysis**

655 For principal component analysis (PCA), all the data including cortical neurons RNAseq data, iN  
656 data and PsychENCODE data were first transformed by  $\log_{10}(x+1)$ . All samples including our  
657 SLO and CTRL samples, the aged and young groups in PsychENCODE (as described above),  
658 and iNs. combined as a single data matrix (samples by genes) for PCA.

659

### 660 **Pathway Analysis**

661 DEGs from each group were analyzed for differentially regulated pathways using  
662 ENRICH (www.enrichr.org) which utilizes several pathway databases for general pathway  
663 analysis. For our analysis, the KEGG and Wikipathway databases were utilized. DEGs were  
664 defined as >100 TPM and >2-fold change over each of the other groups. Pathways that were  
665 statistically significant were highlighted as potential differentially regulated. Only pathways that  
666 were found significant in more than one of the three analyses were considered for further  
667 evaluation.

668

### 669 **qRT-PCR**

670 RNA samples were obtained using the RNeasy Plus Mini kit (Qiagen) following  
671 manufacturer’s instructions. cDNA libraries were constructed using iScript cDNA Synthesis kit  
672 (Bio-Rad) using 500ng of purified RNA from each sample as input following manufacturer’s  
673 instructions. qRT-PCR was performed on a CFX Connect qPCR machine (Bio-Rad) using iTaq

674 SYBR green supermix (Bio-Rad) and equal amounts of cDNA samples. Results were normalized  
675 to GAPDH or 18s rRNA levels using the  $\Delta\Delta C_t$  method.

676

### 677 **SA- $\beta$ Galactosidase assay**

678 Fibroblasts were fixed using 1X fixation buffer provided in reagents and procedure were  
679 performed following manufacturer's instructions for Cellular Senescence Assay Kit (Sigma,  
680 KAA002). Bright-field mages were acquired using a Nikon microscope and positive cell numbers  
681 calculated using the Fiji software. Positive cells were grouped based on their appearance after  $\beta$ -  
682 Gal staining using histogram function (quantity of staining) to the high and moderate.

683

### 684 **Live and Dead cell staining**

685 For the cell toxicity assay, cells were plated in 96 well optical plates at a density of 30,000 cells  
686 per well and each 3 well (experimental replicates) treated with different small molecules for 24 hr.  
687 Then cells were washed with PBS and incubate with 1  $\mu$ M EthD-1 and 1  $\mu$ M calcein AM in the  
688 LIVE/DEAD™ Viability/Cytotoxicity Kit (Thermo Fisher, L3224) for 30 min at RT and imaged using  
689 Operetta (Perkin Elmer) and analyzed with Harmony software.

690

### 691 **Single nucleotide polymorphism (SNP) modification in TARDBP locus**

692 To perform single nucleotide polymorphism (SNP) modification, we utilized the single-strand  
693 oligonucleotide (ssODN) method. Following sgRNA identification for the site of interest using the  
694 crispr.mit.edu design tool, we cloned the sgRNA sequences into the pLentiCRISPR-V1 plasmid  
695 from the laboratory of Feng Zhang (not available through Addgene anymore, but V2 version is  
696 plasmid #52961) following the protocol provided with the plasmid (Sanjana NE et al., 2014). Cells  
697 were cultured and electroporated as described in Chen Y et al., 2015. Single hESCs ( $1 \times 10^7$  cells)  
698 were electroporated with appropriate combination of plasmids in 500 microliters of Electroporation  
699 Buffer (KCl 5mM, MgCl<sub>2</sub> 5mM, HEPES 15mM, Na<sub>2</sub>HPO<sub>4</sub> 102.94mM, NaH<sub>2</sub>PO<sub>4</sub> 47.06mM,  
700 PH=7.2) using the Gene Pulser Xcell System (Bio-Rad) at 250 V, 500 $\mu$ F in a 0.4 cm cuvettes  
701 (Phenix Research Products). Cells were electroporated in a cocktail of 15 micrograms of the  
702 pLentiCRISPRV1-TDP43 sg14 plasmid and 100 microliters of a 10 micromolar ssODN targeting  
703 the TDP43 G298S mutant genetic site. This ssODN was non-complementary to the sgRNA  
704 sequence and consisted of 141 nucleotides – 70 nucleotides upstream and 70 nucleotides  
705 downstream of the targeted indel generation site (Yang et al. 2013). Following electroporation,  
706 cells were plated on MEF feeders in 1.0  $\mu$ M ROCK inhibitor. At 24- and 72-hours post-  
707 electroporation, cells were treated with puromycin (0.5  $\mu$ g/ml, Invitrogen, ant-pr-1) to select for

708 cells containing the pLentiCRISPRV1-TDP43 sg14 plasmid. After removal of the puromycin at 96  
709 hours, cells were cultured in MEF-conditioned hPSC media until colonies were visible.

710  
711 For genotyping single-cell generated colonies were manually selected and mechanically  
712 disaggregated. Genomic DNA was amplified using Q5 polymerase-based PCR (NEB) and proper  
713 clones determined using sanger sequencing. To identify non-specific genome editing, we  
714 analyzed suspected off-target sites for genome modification, using the 5 highest-likelihood off  
715 target sites predicted by the [crispr.mit.edu](http://crispr.mit.edu) algorithms.

716  
717 **Mitochondrial morphology (Mitotracker) and membrane potential assay (JC-10 assay)**  
718 Neuronal progenitors were plated on Cellvis 35mm glass bottom dishes at 30,000 cells per dish  
719 and matured for 7 days. Mitotracker red (M7512, Invitrogen) were added directly to the culture  
720 media at final concentrations of 50nM and incubated for 15min in the incubator. Cells were then  
721 washed three times with phenol free neurobasal media (pre-warmed to 37°C) and switched to  
722 2mL of pre-warmed neuronal media. Imaging was performed on a Nikon A1s confocal microscope  
723 with live cell chamber incubation. Nikon Elements software were used to acquire images under  
724 resonant scanning mode.

725 Mitochondrial membrane potential assay was performed using JC-10 mitochondrial membrane  
726 potential assay kit (ab112134, Abcam). H9 derived Cortical neuron progenitors and 298G and  
727 298S hiPSC derived motor neuron progenitors were plated at 18000 cells per well in a 96 well  
728 imaging plate (Cell carrier). Neurons were treated with SLO (1:1000) at day 7 for cortical neurons  
729 and at day 4 for motor neurons. JC-10 assay was performed at Day 11 for cortical neurons and  
730 Day 9 for motor neurons. FCCP (mitochondrial uncoupler) at 2µM was used as a positive control.  
731 Neurons for positive control were treated with FCCP for 30 mins at 37°C followed by a wash with  
732 the complete neuronal medium. First, JC10 buffer A was added to the neurons and incubated for  
733 30 minutes at 37°C. Then both JC10 buffer B and Nucblue live ready reagent (Thermo fisher)  
734 were added to the neurons and imaged immediately. Live cell imaging was acquired using High  
735 content microscopy (Operetta- Perkin Elmer). Image analysis was performed using Columbus  
736 software. Statistical analysis was made using GraphPad Prism 9.0.

737  
738 **MitoSoX staining**

739 MitoSox imaging assay was performed using MitoSOX™ Red Mitochondrial Superoxide Indicator  
740 purchased from Thermo Fisher (M36008). MitoSOX red (5µM) was added to the neurons and

741 incubated for 30 minutes at 37°C. MitoSOX was removed after 30 minutes and Nucblue live ready  
742 reagent was added to the neurons and imaged immediately.

743

#### 744 **Immuno blotting**

745 H9 derived cortical neurons were gently scraped off the wells, washed with PBS and centrifuged  
746 at 1600 rpm for 2 mins. Pellets were lysed on ice using RIPA lysis buffer (Cell Signaling)  
747 supplemented with Halt Protease and Phosphatase inhibitor cocktail (Thermo Fisher Scientific)  
748 and 4-(2-Aminoethyl)benzenesulfonyl fluoride hydrochloride (AEBSF, Sigma). Samples were  
749 centrifuged at 18000rpm for 20 min at 4°C. Total protein concentrations were measured using  
750 Pierce BCA protein assay (Thermo Fisher Scientific). 2x Laemmli sample buffer (Bio-rad) was  
751 added to the protein sample and boiled at 95°C for 5 minutes. Protein samples (10µg/group) were  
752 run on 4-20% Mini-Protean TGX precast gel (Bio-rad), transferred to polyvinylidene difluoride  
753 (PVDF) membranes, blocked with 5% non-fat dry milk and then incubated with primary antibodies  
754 overnight at 4°C. Signals were visualized using horseradish peroxidase conjugated secondary  
755 antibodies and captured with ChemiDoc system. The following primary antibodies were used:  
756 LAP2 (1:5000, BD Biosciences), H3K9Me3 (1:5000, Abcam), HP1Y (1:1000, Cell signaling).

757

#### 758 **References**

- 759 1. Paganoni S, Cudkowicz M, Berry JD. Outcome measures in amyotrophic lateral sclerosis  
760 clinical trials. *Clin Investig (Lond)* **4**, 605-618 (2014). [doi.org/10.4155/cli.14.52](https://doi.org/10.4155/cli.14.52)
- 761
- 762 2. Mitsumoto H, Brooks BR, Silani V. Clinical trials in amyotrophic lateral sclerosis: why so  
763 many negative trials and how can trials be improved? *Lancet Neurol* **13**, 1127-1138  
764 (2014). [doi.org/10.1016/S1474-4422\(14\)70129-2](https://doi.org/10.1016/S1474-4422(14)70129-2)
- 765
- 766 3. Chen H, *et al.* Modeling ALS with iPSCs reveals that mutant SOD1 misregulates  
767 neurofilament balance in motor neurons. *Cell Stem Cell* **14**, 796-809 (2014).  
768 [doi.org/10.1016/j.stem.2014.02.004](https://doi.org/10.1016/j.stem.2014.02.004).
- 769
- 770 4. Sances S, *et al.* Modeling ALS with motor neurons derived from human induced  
771 pluripotent stem cells. *Nat Neurosci* **19**, 542-553 (2016). [doi.org/10.1038/nn.4273](https://doi.org/10.1038/nn.4273)
- 772
- 773 5. Lapasset L, *et al.* Rejuvenating senescent and centenarian human cells by reprogramming  
774 through the pluripotent state. *Genes Dev* **25**, 2248-2253 (2011).  
775 [doi.org/10.1101/gad.173922.111](https://doi.org/10.1101/gad.173922.111)

776

- 777 6. Rando TA, Chang HY. Aging, rejuvenation, and epigenetic reprogramming: resetting the  
778 aging clock. *Cell* **148**, 46-57 (2012). [doi.org/10.1016/j.cell.2012.01.003](https://doi.org/10.1016/j.cell.2012.01.003)  
779  
780 7. Miller JD, *et al.* Human iPSC-based modeling of late-onset disease via progerin-induced  
781 aging. *Cell Stem Cell* **13**, 691-705 (2013). [doi.org/10.1016/j.stem.2013.11.006](https://doi.org/10.1016/j.stem.2013.11.006)  
782  
783 8. Menendez JA, Vellon L, Oliveras-Ferraros C, Cufi S, Vazquez-Martin A. mTOR-regulated  
784 senescence and autophagy during reprogramming of somatic cells to pluripotency: a  
785 roadmap from energy metabolism to stem cell renewal and aging. *Cell Cycle* **10**, 3658-  
786 3677 (2011). [doi.org/ 10.4161/cc.10.21.18128](https://doi.org/10.4161/cc.10.21.18128)  
787  
788 9. Patterson M, *et al.* Defining the nature of human pluripotent stem cell progeny. *Cell Res*  
789 **22**, 178-193 (2012). [doi.org/10.1038/cr.2011.133](https://doi.org/10.1038/cr.2011.133)  
790  
791 10. Nicholas CR, *et al.* Functional maturation of hPSC-derived forebrain interneurons requires  
792 an extended timeline and mimics human neural development. *Cell Stem Cell* **12**, 573-586  
793 (2013). [doi.org/10.1016/j.stem.2013.04.005](https://doi.org/10.1016/j.stem.2013.04.005)  
794  
795 11. Vera E, Studer L. When rejuvenation is a problem: challenges of modeling late-onset  
796 neurodegenerative disease. *Development* **142**, 3085-3089 (2015).  
797 [doi.org/10.1242/dev.120667](https://doi.org/10.1242/dev.120667)  
798  
799 12. Vierbuchen T, Ostermeier A, Pang ZP, Kokubu Y, Sudhof TC, Wernig M. Direct  
800 conversion of fibroblasts to functional neurons by defined factors. *Nature* **463**, 1035-1041  
801 (2010). [doi.org/10.1038/nature08797](https://doi.org/10.1038/nature08797)  
802  
803 13. Mertens J, *et al.* Directly Reprogrammed Human Neurons Retain Aging-Associated  
804 Transcriptomic Signatures and Reveal Age-Related Nucleocytoplasmic Defects. *Cell*  
805 *Stem Cell* **17**, 705-718 (2015). [doi.org/10.1016/j.stem.2015.09.001](https://doi.org/10.1016/j.stem.2015.09.001)  
806  
807 14. Childs BG, Durik M, Baker DJ, van Deursen JM. Cellular senescence in aging and age-  
808 related disease: from mechanisms to therapy. *Nat Med* **21**, 1424-1435 (2015).  
809 [doi.org/10.1038/nm.4000](https://doi.org/10.1038/nm.4000)  
810  
811 15. Petrova NV, Velichko AK, Razin SV, Kantidze OL. Small molecule compounds that induce  
812 cellular senescence. *Aging Cell* **15**, 999-1017 (2016). [doi.org/10.1111/acer.12518](https://doi.org/10.1111/acer.12518)  
813

- 814 16. Lo Sardo V, Ferguson W, Erikson GA, Topol EJ, Baldwin KK, Torkamani A. Influence of  
815 donor age on induced pluripotent stem cells. *Nat Biotechnol* **35**, 69-74 (2017).  
816 [doi.org/10.1038/nbt.3749](https://doi.org/10.1038/nbt.3749)
- 817 17. Zhao H, Darzynkiewicz Z. Biomarkers of cell senescence assessed by imaging cytometry.  
818 *Methods Mol Biol* **965**, 83-92 (2013). [doi.org/10.1007/978-1-62703-239-1\\_5](https://doi.org/10.1007/978-1-62703-239-1_5)
- 819
- 820 18. Qi Y, *et al.* Combined small-molecule inhibition accelerates the derivation of functional  
821 cortical neurons from human pluripotent stem cells. *Nat Biotechnol* **35**, 154-163 (2017).  
822 [doi.org/10.1038/nbt.3777](https://doi.org/10.1038/nbt.3777)
- 823
- 824 19. Kim Y, *et al.* Mitochondrial Aging Defects Emerge in Directly Reprogrammed Human  
825 Neurons due to Their Metabolic Profile. *Cell Rep* **23**, 2550-2558 (2018). [doi.org/](https://doi.org/10.1016/j.celrep.2018.04.105)  
826 [10.1016/j.celrep.2018.04.105](https://doi.org/10.1016/j.celrep.2018.04.105)
- 827
- 828 20. Wang D, *et al.* Comprehensive functional genomic resource and integrative model for the  
829 human brain. *Science* **362**, (2018). [doi.org/10.1126/science.aat8464](https://doi.org/10.1126/science.aat8464)
- 830
- 831 21. Dreesen O, Stewart CL. Accelerated aging syndromes, are they relevant to normal human  
832 aging? *Aging (Albany NY)* **3**, 889-895 (2011). [doi.org/10.18632/aging.100383](https://doi.org/10.18632/aging.100383)
- 833
- 834 22. Kyng KJ, May A, Kolvraa S, Bohr VA. Gene expression profiling in Werner syndrome  
835 closely resembles that of normal aging. *Proc Natl Acad Sci U S A* **100**, 12259-12264  
836 (2003). [doi.org/10.1073/pnas.2130723100](https://doi.org/10.1073/pnas.2130723100)
- 837
- 838 23. Du ZW, *et al.* Generation and expansion of highly pure motor neuron progenitors from  
839 human pluripotent stem cells. *Nat Commun* **6**, 6626 (2015).  
840 [doi.org/10.1038/ncomms7626](https://doi.org/10.1038/ncomms7626)
- 841
- 842 24. Baker DJ, Petersen RC. Cellular senescence in brain aging and neurodegenerative  
843 diseases: evidence and perspectives. *J Clin Invest* **128**, 1208-1216 (2018).  
844 [doi.org/10.1172/JCI95145](https://doi.org/10.1172/JCI95145)
- 845
- 846 25. Bickford PC, Flowers A, Grimmig B. Aging leads to altered microglial function that reduces  
847 brain resiliency increasing vulnerability to neurodegenerative diseases. *Exp Gerontol* **94**,  
848 4-8 (2017). [doi.org/10.1016/j.exger.2017.01.027](https://doi.org/10.1016/j.exger.2017.01.027)
- 849
- 850 26. Duncan GW. The aging brain and neurodegenerative diseases. *Clin Geriatr Med* **27**, 629-  
851 644 (2011). [doi.org/10.1016/j.cger.2011.07.008](https://doi.org/10.1016/j.cger.2011.07.008)



- 852  
853 27. Sawada M, Sawada H, Nagatsu T. Effects of aging on neuroprotective and neurotoxic  
854 properties of microglia in neurodegenerative diseases. *Neurodegener Dis* **5**, 254-256  
855 (2008). [doi.org/10.1159/000113717](https://doi.org/10.1159/000113717)
- 856  
857 28. Mertens J, Reid D, Lau S, Kim Y, Gage FH. Aging in a Dish: iPSC-Derived and Directly  
858 Induced Neurons for Studying Brain Aging and Age-Related Neurodegenerative  
859 Diseases. *Annu Rev Genet* **52**, 271-293 (2018). [doi.org/10.1146/annurev-genet-  
860 120417-031534](https://doi.org/10.1146/annurev-genet-120417-031534)
- 861  
862 29. Vernadakis A, Fleischer-Lambropoulos H. Cell culture as a model to study cell-cell  
863 interactions during development aging and neurodegenerative diseases. *Int J Dev*  
864 *Neurosci* **18**, 139-143 (2000). [doi.org/10.1016/S0736-5748\(99\)00081-7](https://doi.org/10.1016/S0736-5748(99)00081-7)
- 865  
866 30. Madabhushi R, Pan L, Tsai LH. DNA damage and its links to neurodegeneration. *Neuron*  
867 **83**, 266-282 (2014). [doi.org/10.1016/j.neuron.2014.06.034](https://doi.org/10.1016/j.neuron.2014.06.034)
- 868  
869 31. Rubinsztein DC, Marino G, Kroemer G. Autophagy and aging. *Cell* **146**, 682-695 (2011).  
870 [doi.org/10.1016/j.cell.2011.07.030](https://doi.org/10.1016/j.cell.2011.07.030)
- 871  
872 32. Satoh A, Imai SI, Guarente L. The brain, sirtuins, and ageing. *Nat Rev Neurosci* **18**, 362-  
873 374 (2017). [doi.org/10.1038/nrn.2017.42](https://doi.org/10.1038/nrn.2017.42)
- 874  
875 33. Lopez-Otin C, Blasco MA, Partridge L, Serrano M, Kroemer G. The hallmarks of aging.  
876 *Cell* **153**, 1194-1217 (2013). [doi.org/10.1016/j.cell.2013.05.039](https://doi.org/10.1016/j.cell.2013.05.039)
- 877  
878 34. Hernandez-Segura A, Nehme J, Demaria M. Hallmarks of Cellular Senescence. *Trends*  
879 *Cell Biol* **28**, 436-453 (2018). [doi.org/10.1016/j.tcb.2018.02.001](https://doi.org/10.1016/j.tcb.2018.02.001)
- 880  
881 35. Coppe JP, Rodier F, Patil CK, Freund A, Desprez PY, Campisi J. Tumor suppressor and  
882 aging biomarker p16(INK4a) induces cellular senescence without the associated  
883 inflammatory secretory phenotype. *J Biol Chem* **286**, 36396-36403  
884 (2011). [doi.org/10.1074/jbc.M111.257071](https://doi.org/10.1074/jbc.M111.257071)
- 885  
886 36. Rayess H, Wang MB, Srivatsan ES. Cellular senescence and tumor suppressor gene p16.  
887 *Int J Cancer* **130**, 1715-1725 (2012). [doi.org/10.1002/ijc.27316](https://doi.org/10.1002/ijc.27316)
- 888

- 889 37. Bonda DJ, *et al.* The sirtuin pathway in ageing and Alzheimer disease: mechanistic and  
890 therapeutic considerations. *Lancet Neurol* **10**, 275-279 (2011). [doi.org/10.1016/s1474-  
891 4422\(11\)70013-8](https://doi.org/10.1016/s1474-4422(11)70013-8)
- 892
- 893 38. Scotter EL, *et al.* Differential roles of the ubiquitin proteasome system and autophagy in  
894 the clearance of soluble and aggregated TDP-43 species. *J Cell Sci* **127**, 1263-1278  
895 (2014). [doi.org/10.1242/jcs.140087](https://doi.org/10.1242/jcs.140087)
- 896
- 897 39. Pan T, Kondo S, Le W, Jankovic J. The role of autophagy-lysosome pathway in  
898 neurodegeneration associated with Parkinson's disease. *Brain* **131**, 1969-1978 (2008).  
899 [doi.org/10.1093/brain/awm318](https://doi.org/10.1093/brain/awm318)
- 900
- 901 40. Zhang Y, Chen X, Zhao Y, Ponnusamy M, Liu Y. The role of ubiquitin proteasomal system  
902 and autophagy-lysosome pathway in Alzheimer's disease. *Rev Neurosci* **28**, 861-868  
903 (2017). [doi.org/10.1515/revneuro-2017-0013](https://doi.org/10.1515/revneuro-2017-0013)
- 904
- 905 41. Wyss-Coray T. Ageing, neurodegeneration and brain rejuvenation. *Nature* **539**, 180-186  
906 (2016). [doi.org/10.1038/nature20411](https://doi.org/10.1038/nature20411)
- 907
- 908 42. He LQ, Lu JH, Yue ZY. Autophagy in ageing and ageing-associated diseases. *Acta*  
909 *Pharmacol Sin* **34**, 605-611 (2013). [doi.org/10.1038/aps.2012.188](https://doi.org/10.1038/aps.2012.188)
- 910
- 911 43. Campos PB, Paulsen BS, Rehen SK. Accelerating neuronal aging in in vitro model brain  
912 disorders: a focus on reactive oxygen species. *Front Aging Neurosci* **6**, 292 (2014).  
913 [doi.org/10.3389/fnagi.2014.00292](https://doi.org/10.3389/fnagi.2014.00292)
- 914
- 915 44. Leandro GS, Sykora P, Bohr VA. The impact of base excision DNA repair in age-related  
916 neurodegenerative diseases. *Mutat Res* **776**, 31-39 (2015).  
917 [doi.org/10.1016/j.mrfmmm.2014.12.011](https://doi.org/10.1016/j.mrfmmm.2014.12.011)
- 918
- 919 45. Maynard S, Fang EF, Scheibye-Knudsen M, Croteau DL, Bohr VA. DNA Damage, DNA  
920 Repair, Aging, and Neurodegeneration. *Cold Spring Harb Perspect Med* **5**, (2015).  
921 [doi.org/10.1101/cshperspect.a025130](https://doi.org/10.1101/cshperspect.a025130)
- 922
- 923 46. Coffinier C, *et al.* HIV protease inhibitors block the zinc metalloproteinase ZMPSTE24 and  
924 lead to an accumulation of prelamin A in cells. *Proc Natl Acad Sci U S A* **104**, 13432-  
925 13437 (2007). [doi.org/10.1073/pnas.0704212104](https://doi.org/10.1073/pnas.0704212104)

- 926 47. Mehmood S, *et al.* Mass spectrometry captures off-target drug binding and provides  
927 mechanistic insights into the human metalloprotease ZMPSTE24. *Nat Chem* **8**, 1152-1158  
928 (2016). [doi.org/10.1038/nchem.2591](https://doi.org/10.1038/nchem.2591)
- 929
- 930 48. Wang Y, *et al.* A mutation abolishing the ZMPSTE24 cleavage site in prelamin A causes  
931 a progeroid disorder. *J Cell Sci* **129**, 1975-1980 (2016). [doi.org/10.1242/jcs.187302](https://doi.org/10.1242/jcs.187302)
- 932
- 933 49. Afonso P, *et al.* LMNA mutations resulting in lipodystrophy and HIV protease inhibitors  
934 trigger vascular smooth muscle cell senescence and calcification: Role of ZMPSTE24  
935 downregulation. *Atherosclerosis* **245**, 200-211 (2016).  
936 [doi.org/10.1016/j.atherosclerosis.2015.12.012](https://doi.org/10.1016/j.atherosclerosis.2015.12.012)
- 937
- 938 50. Spear ED, Hsu ET, Nie L, Carpenter EP, Hrycyna CA, Michaelis S. ZMPSTE24 missense  
939 mutations that cause progeroid diseases decrease prelamin A cleavage activity and/or  
940 protein stability. *Dis Model Mech* **11**, (2018). [doi.org/10.1242/dmm.033670](https://doi.org/10.1242/dmm.033670)
- 941
- 942 51. Jung HJ, *et al.* Regulation of prelamin A but not lamin C by miR-9, a brain-specific  
943 microRNA. *Proc Natl Acad Sci U S A* **109**, E423-431 (2012).  
944 [doi.org/10.1073/pnas.1111780109](https://doi.org/10.1073/pnas.1111780109)
- 945
- 946 52. Yang SH, *et al.* Mice that express farnesylated versions of prelamin A in neurons develop  
947 achalasia. *Hum Mol Genet* **24**, 2826-2840 (2015). [doi.org/10.1093/hmg/ddv043](https://doi.org/10.1093/hmg/ddv043)
- 948
- 949 53. Kumar D, Thakur MK. Age-related expression of Neurexin1 and Neuroligin3 is correlated  
950 with presynaptic density in the cerebral cortex and hippocampus of male mice. *Age (Dordr)*  
951 **37**, 17 (2015). [doi.org/10.1007/s11357-015-9752-6](https://doi.org/10.1007/s11357-015-9752-6)
- 952
- 953 54. Konar A, Singh P, Thakur MK. Age-associated Cognitive Decline: Insights into Molecular  
954 Switches and Recovery Avenues. *Aging Dis* **7**, 121-129 (2016).  
955 [doi.org/10.14336/AD.2015.1004](https://doi.org/10.14336/AD.2015.1004)
- 956
- 957 55. Paramanik V, Thakur MK. Role of CREB signaling in aging brain. *Arch Ital Biol* **151**, 33-  
958 42 (2013). [doi.org/10.4449/aib.v151i1.1461](https://doi.org/10.4449/aib.v151i1.1461)
- 959
- 960 56. Ma S, Attarwala IY, Xie XQ. SQSTM1/p62: A Potential Target for Neurodegenerative  
961 Disease. *ACS Chem Neurosci* **10**, 2094-2114 (2019).  
962 [doi.org/10.1021/acscchemneuro.8b00516](https://doi.org/10.1021/acscchemneuro.8b00516)

- 963  
964 57. Gevry N, Chan HM, Laflamme L, Livingston DM, Gaudreau L. p21 transcription is  
965 regulated by differential localization of histone H2A.Z. *Genes Dev* **21**, 1869-1881 (2007).  
966 [doi.org/10.1101/gad.1545707](https://doi.org/10.1101/gad.1545707)
- 967  
968 58. Flex E, *et al.* Aberrant Function of the C-Terminal Tail of HIST1H1E Accelerates Cellular  
969 Senescence and Causes Premature Aging. *Am J Hum Genet*, (2019).  
970 [doi.org/10.1016/j.ajhg.2019.07.007](https://doi.org/10.1016/j.ajhg.2019.07.007)
- 971  
972 59. Qian K, *et al.* Sporadic ALS Astrocytes Induce Neuronal Degeneration In Vivo. *Stem Cell*  
973 *Reports* **8**, 843-855 (2017). [doi.org/10.1016/j.stemcr.2017.03.003](https://doi.org/10.1016/j.stemcr.2017.03.003)
- 974  
975 60. Bilican B, *et al.* Mutant induced pluripotent stem cell lines recapitulate aspects of TDP-43  
976 proteinopathies and reveal cell-specific vulnerability. *Proc Natl Acad Sci U S A* **109**, 5803-  
977 5808 (2012). [doi.org/10.1073/pnas.1202922109](https://doi.org/10.1073/pnas.1202922109)
- 978  
979 61. Fujimori K, *et al.* Modeling sporadic ALS in iPSC-derived motor neurons identifies a  
980 potential therapeutic agent. *Nat Med* **24**, 1579-1589 (2018). [doi.org/10.1038/s41591-018-](https://doi.org/10.1038/s41591-018-0140-5)  
981 [0140-5](https://doi.org/10.1038/s41591-018-0140-5)
- 982  
983 62. Klim JR, *et al.* ALS-implicated protein TDP-43 sustains levels of STMN2, a mediator of  
984 motor neuron growth and repair. *Nat Neurosci* **22**, 167-179 (2019).  
985 [doi.org/10.1038/s41593-018-0300-4](https://doi.org/10.1038/s41593-018-0300-4)
- 986  
987 63. Sanchez-Danes A, *et al.* Disease-specific phenotypes in dopamine neurons from human  
988 iPS-based models of genetic and sporadic Parkinson's disease. *EMBO Mol Med* **4**, 380-  
989 395 (2012). [doi.org/10.1002/emmm.201200215](https://doi.org/10.1002/emmm.201200215)
- 990  
991 64. Reinhardt P, *et al.* Genetic correction of a LRRK2 mutation in human iPSCs links  
992 parkinsonian neurodegeneration to ERK-dependent changes in gene expression. *Cell*  
993 *Stem Cell* **12**, 354-367 (2013). [doi.org/10.1016/j.stem.2013.01.008](https://doi.org/10.1016/j.stem.2013.01.008)
- 994  
995 65. Monzio Compagnoni G, *et al.* Mitochondrial Dysregulation and Impaired Autophagy in  
996 iPSC-Derived Dopaminergic Neurons of Multiple System Atrophy. *Stem Cell Reports* **11**,  
997 1185-1198 (2018). [doi.org/10.1016/j.stemcr.2018.09.007](https://doi.org/10.1016/j.stemcr.2018.09.007)
- 998  
999 66. Kouroupi G, *et al.* Defective synaptic connectivity and axonal neuropathology in a human  
1000 iPSC-based model of familial Parkinson's disease. *Proc Natl Acad Sci U S A* **114**, E3679-  
1001 E3688 (2017). [doi.org/10.1073/pnas.1617259114](https://doi.org/10.1073/pnas.1617259114)

- 1002  
1003 67. Mishima T, Fujioka S, Fukae J, Yuasa-Kawada J, Tsuboi Y. Modeling Parkinson's Disease  
1004 and Atypical Parkinsonian Syndromes Using Induced Pluripotent Stem Cells. *Int J Mol Sci*  
1005 **19**, (2018). [doi.org/10.3390/ijms19123870](https://doi.org/10.3390/ijms19123870).
- 1006 68. Sanjana NE, Shalem O and Zhang F. Improved vectors and genome-wide libraries for  
1007 CRISPR screening. *Nat Methods* 11 (8): 783-784 (2014). [doi.org/10.1038/nmeth.3047](https://doi.org/10.1038/nmeth.3047)
- 1008 69. Chen Y et al., Engineering Human Stem Cell Lines with Inducible Gene Knockout using  
1009 CRISPR/Cas9. *Cell Stem Cell* 17(2):233-44 (2015). [doi.org/ 10.1016/j.stem.2015.06.001](https://doi.org/10.1016/j.stem.2015.06.001)
- 1010 70. Schindelin J et al., Fiji: an open- source platform for biological- image analysis. *Nat*  
1011 *Methods* 9(7)676-82 (2012). [doi.org/10.1038/nmeth.2019](https://doi.org/10.1038/nmeth.2019)

1012

1013

1014

1015

1016

1017

# Figure 1

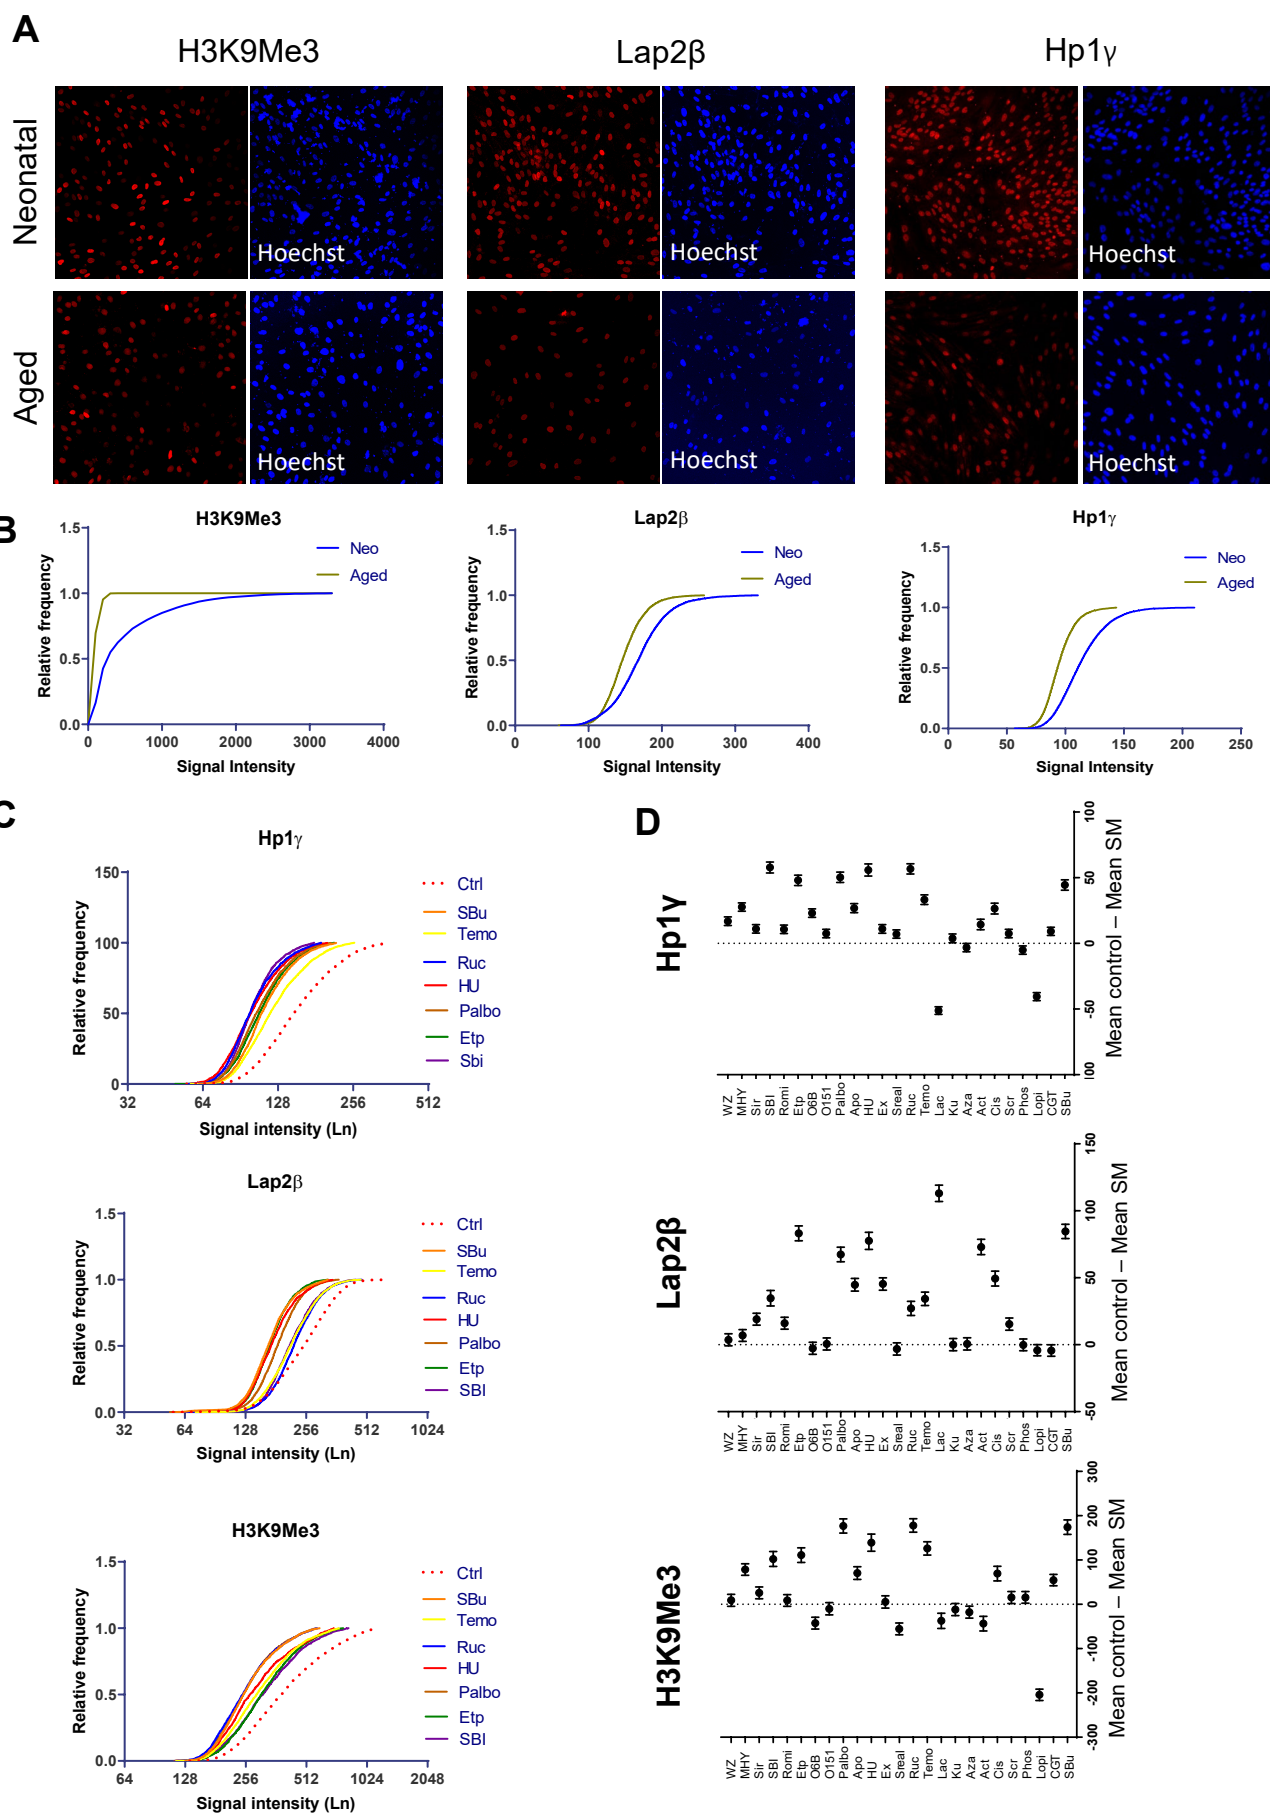



## Figure 2

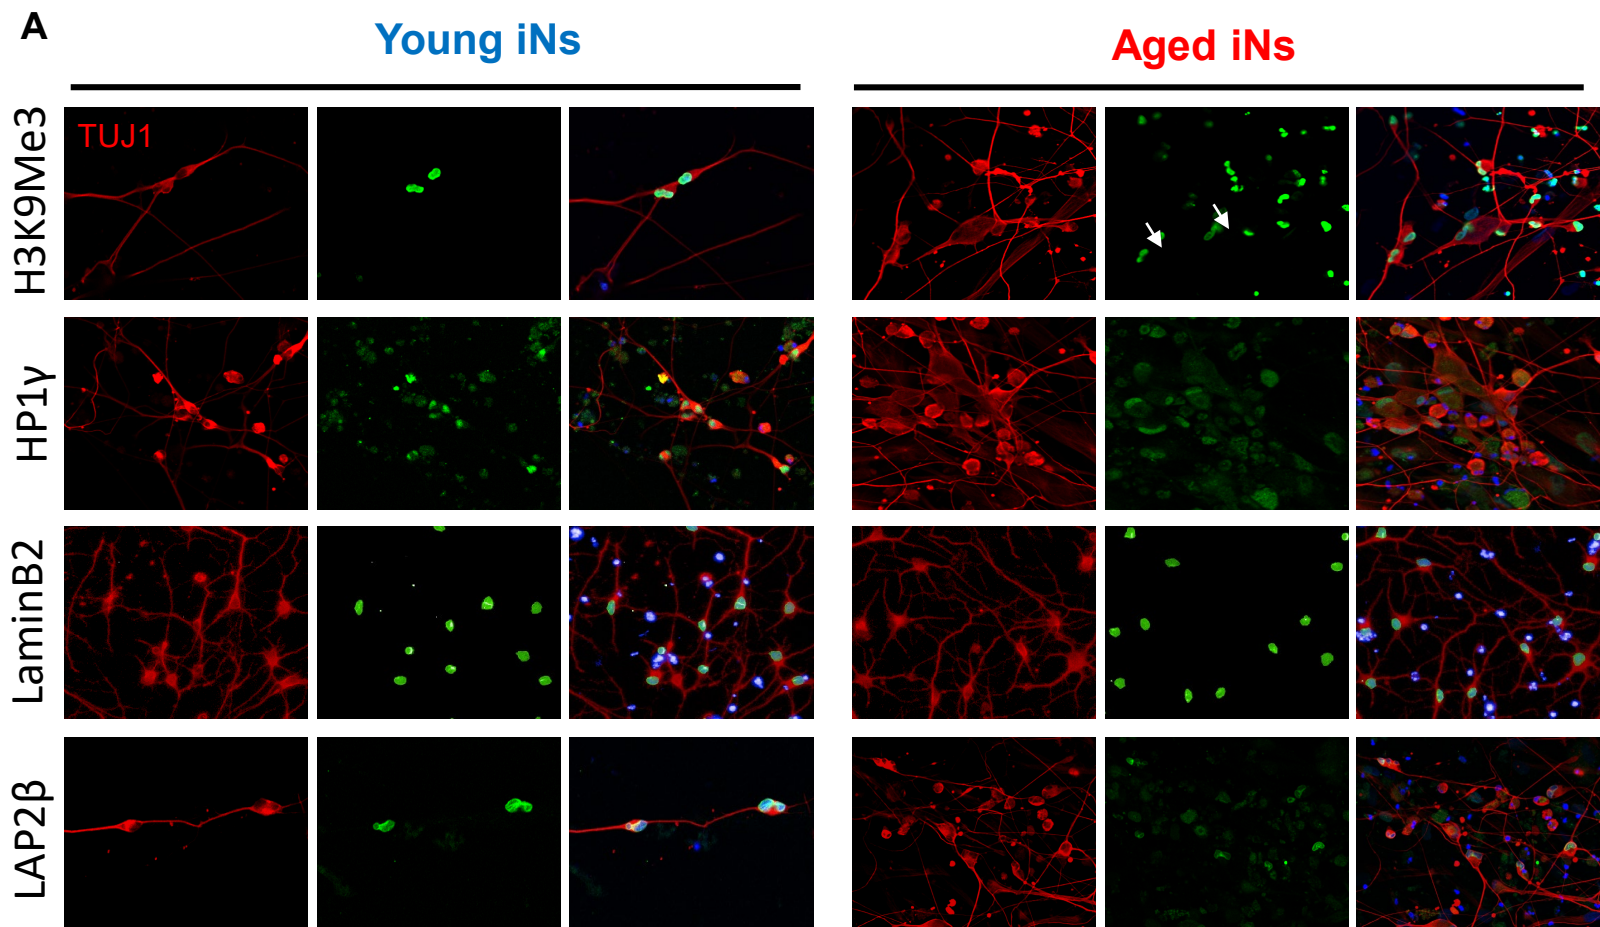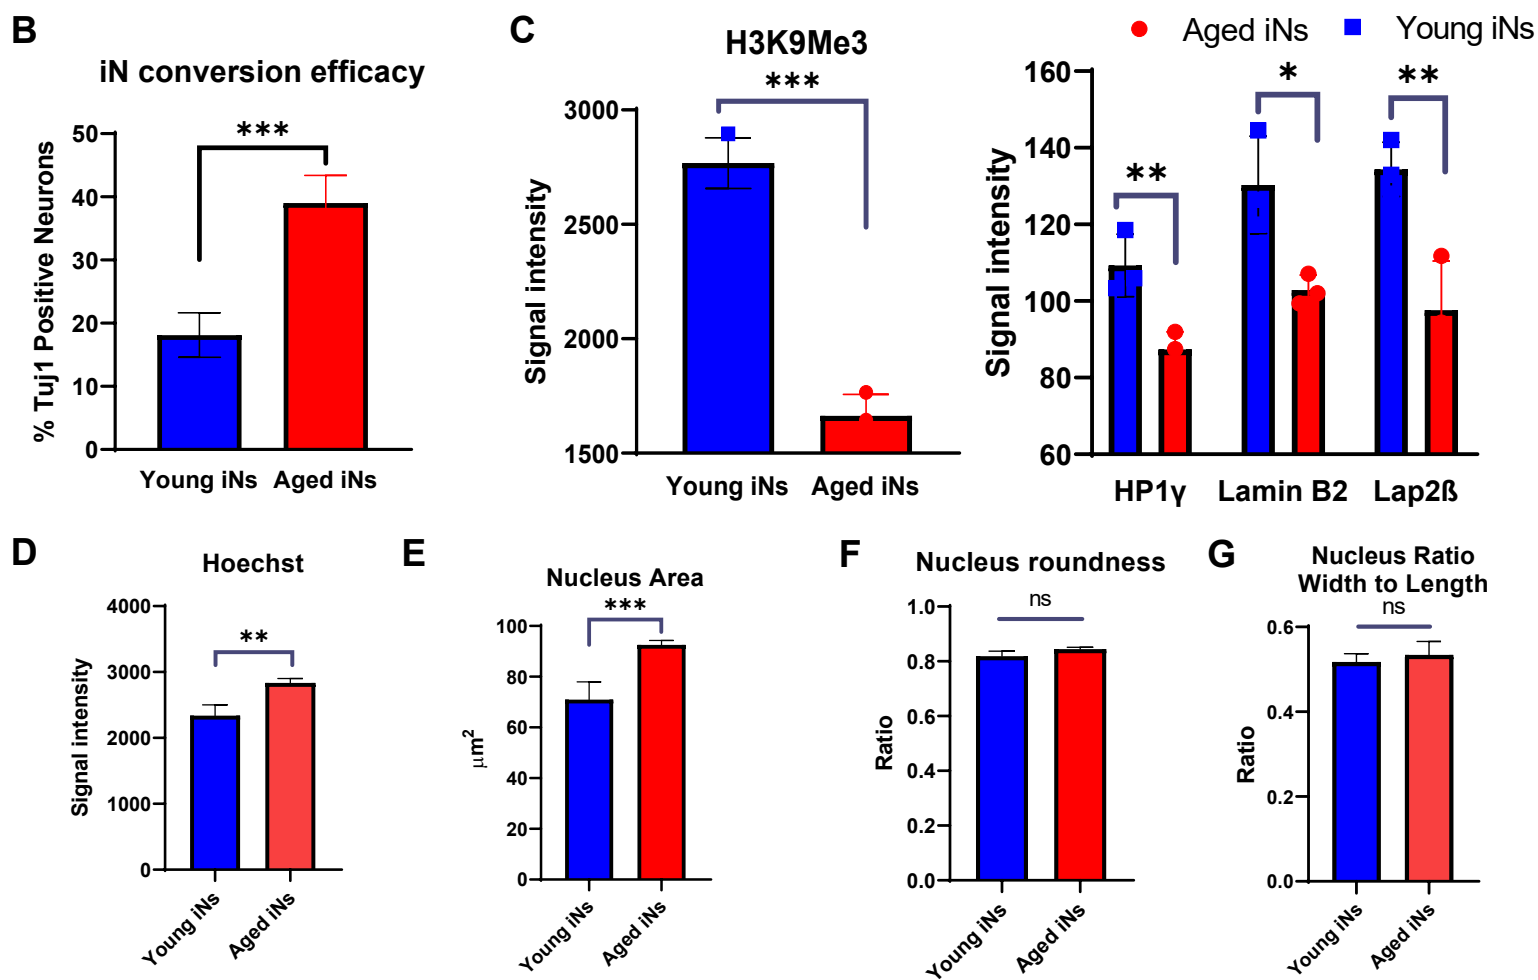

# Figure 3

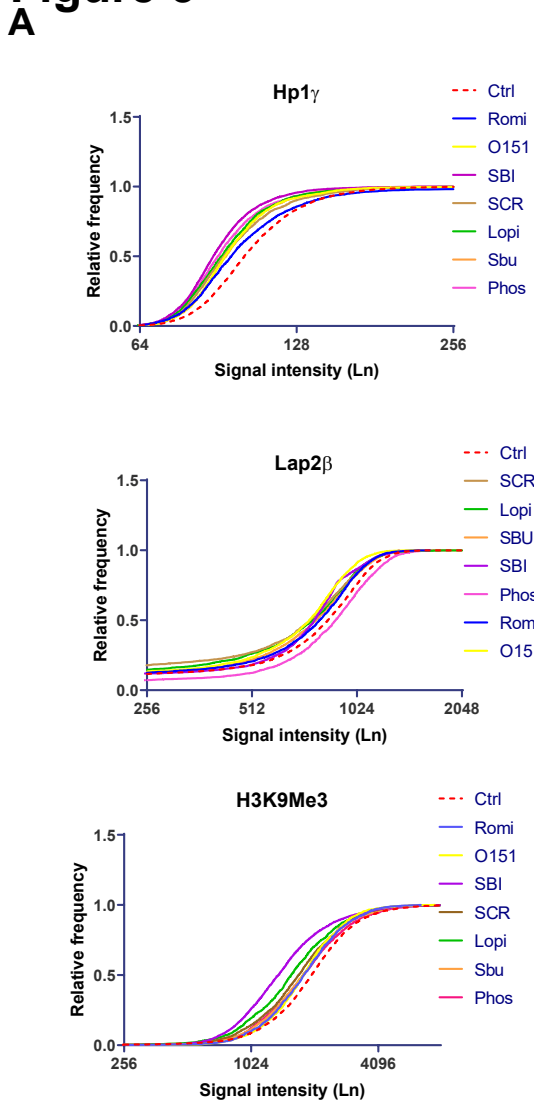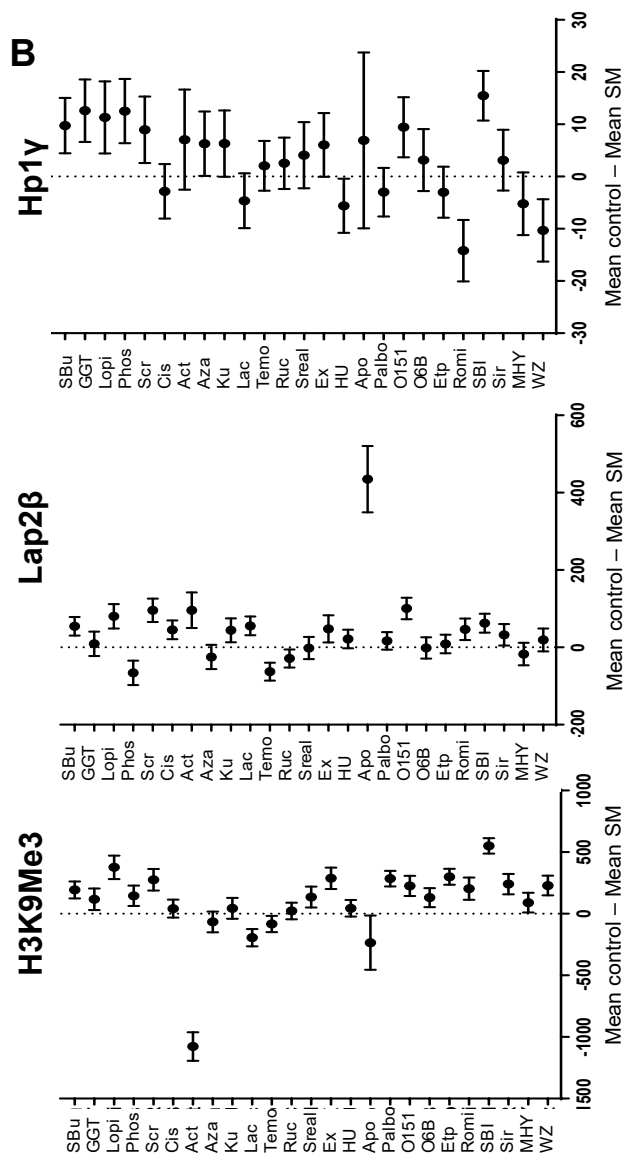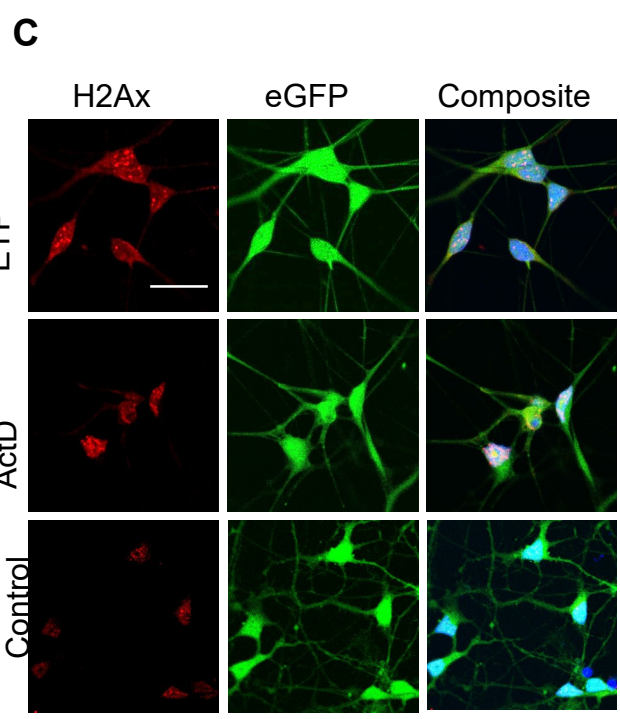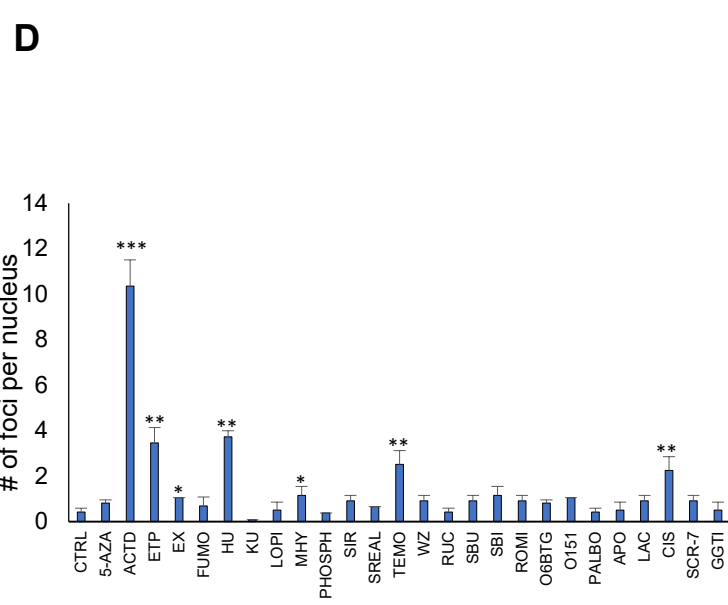

# Figure 4

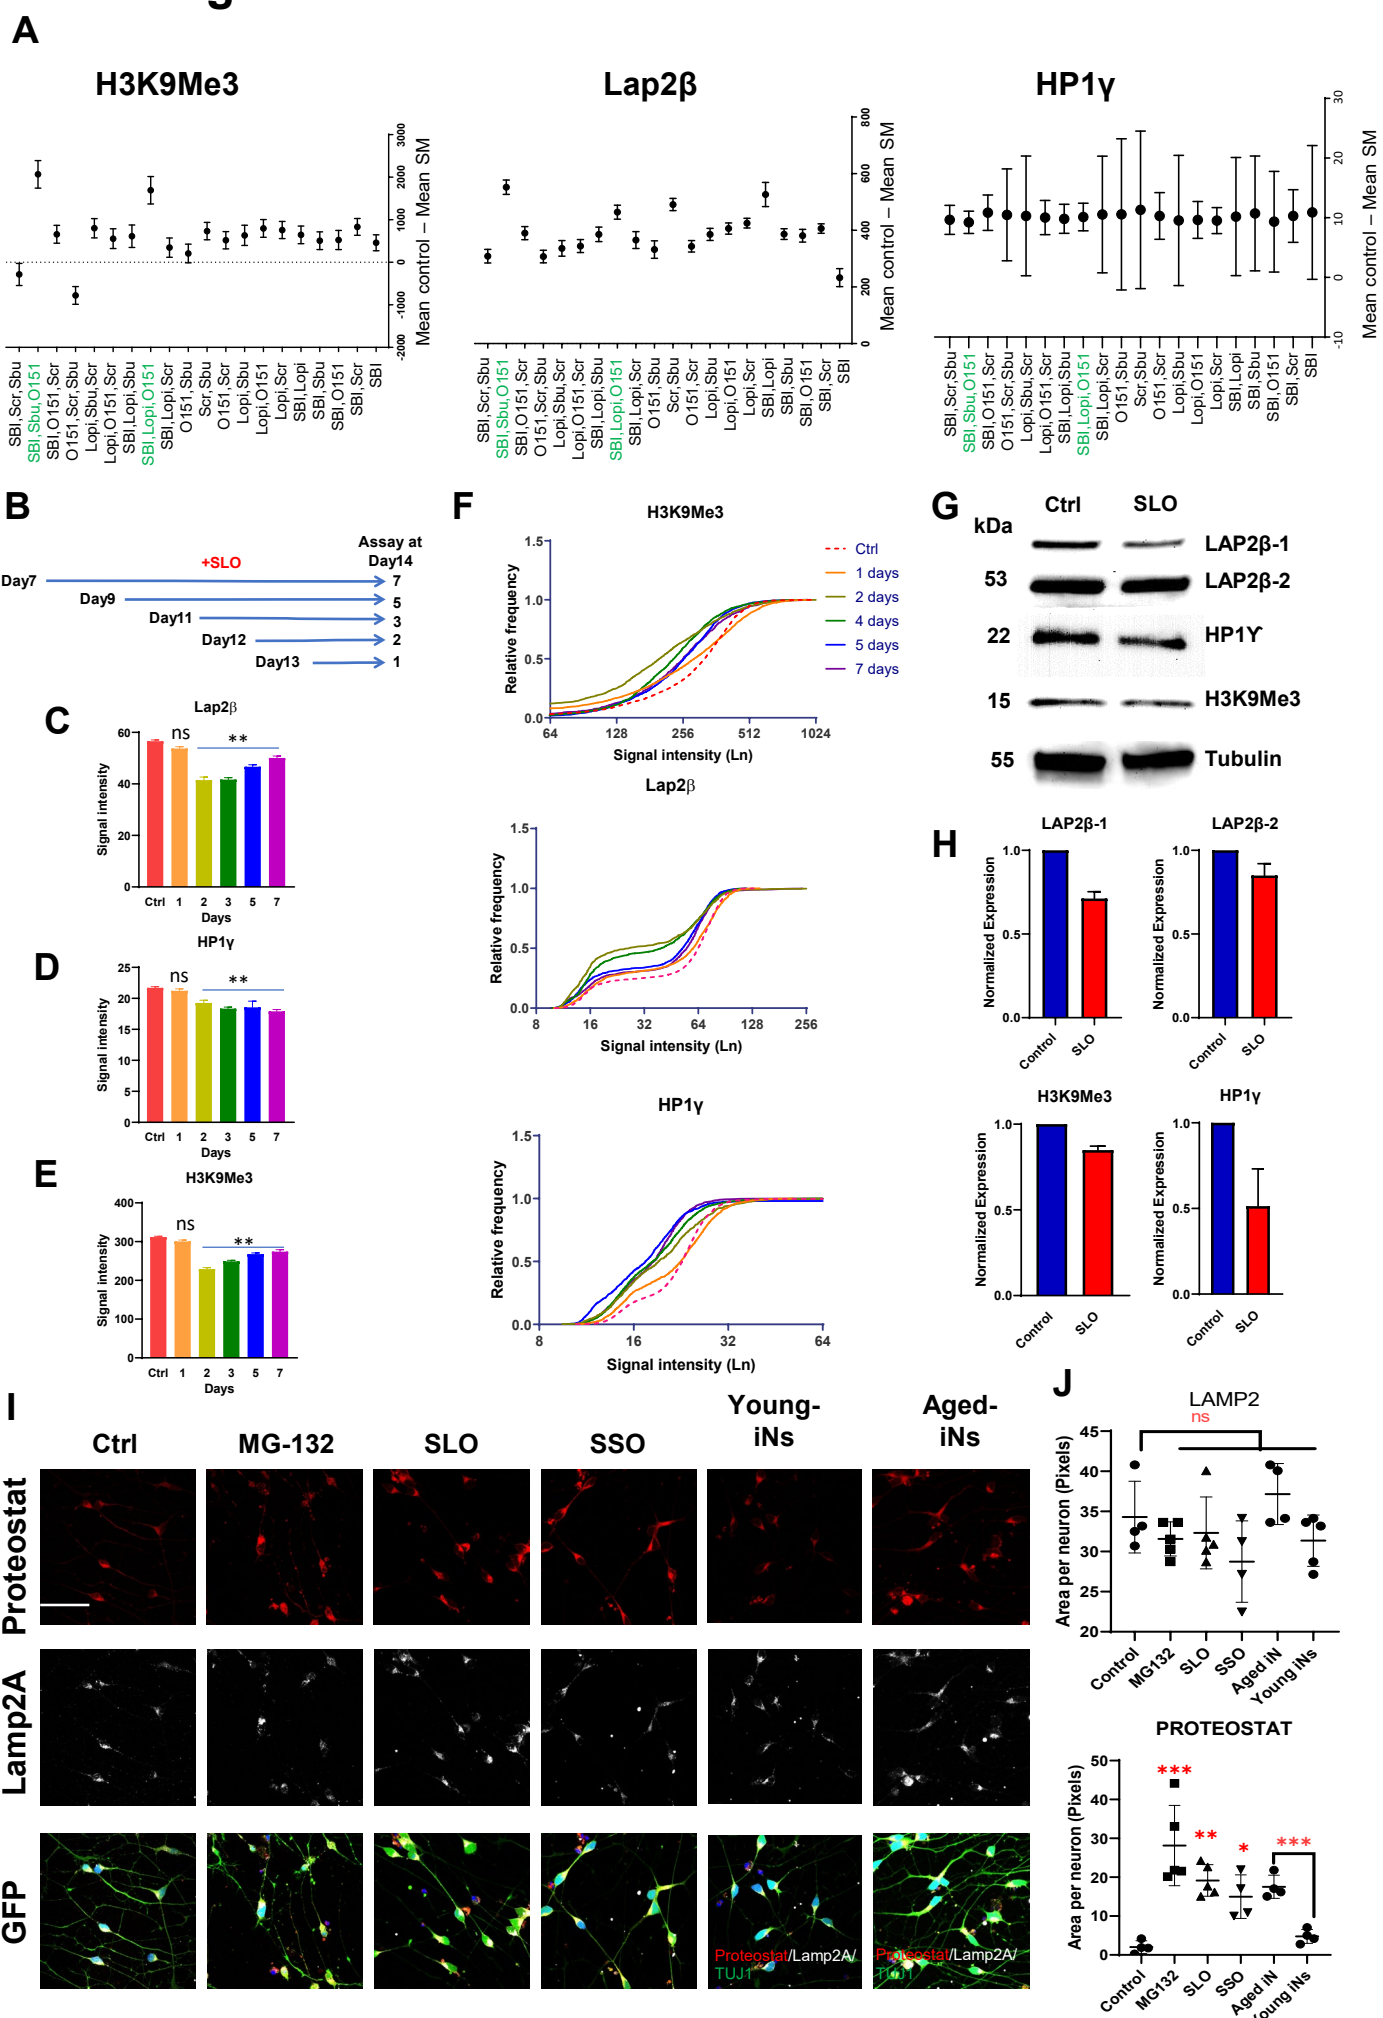

# Figure 5

**A**

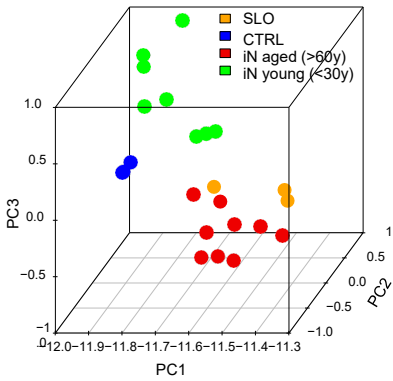

**B**

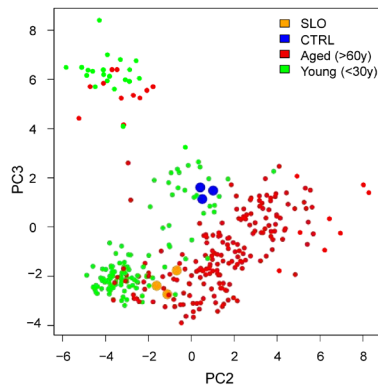

**E**

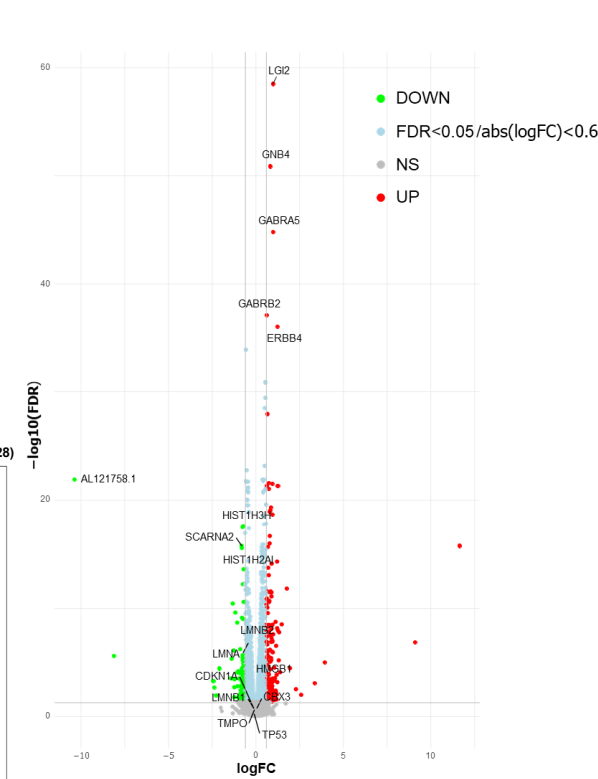

**C**

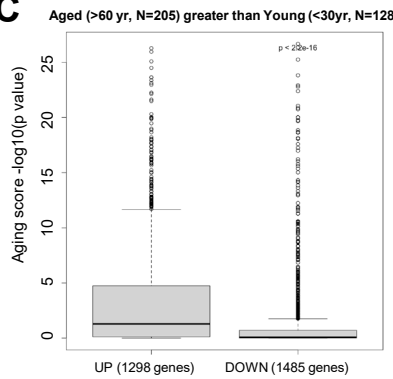

**D**

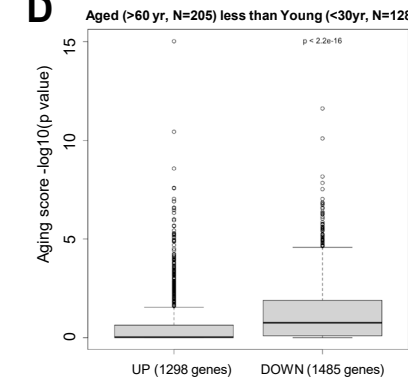

**F**

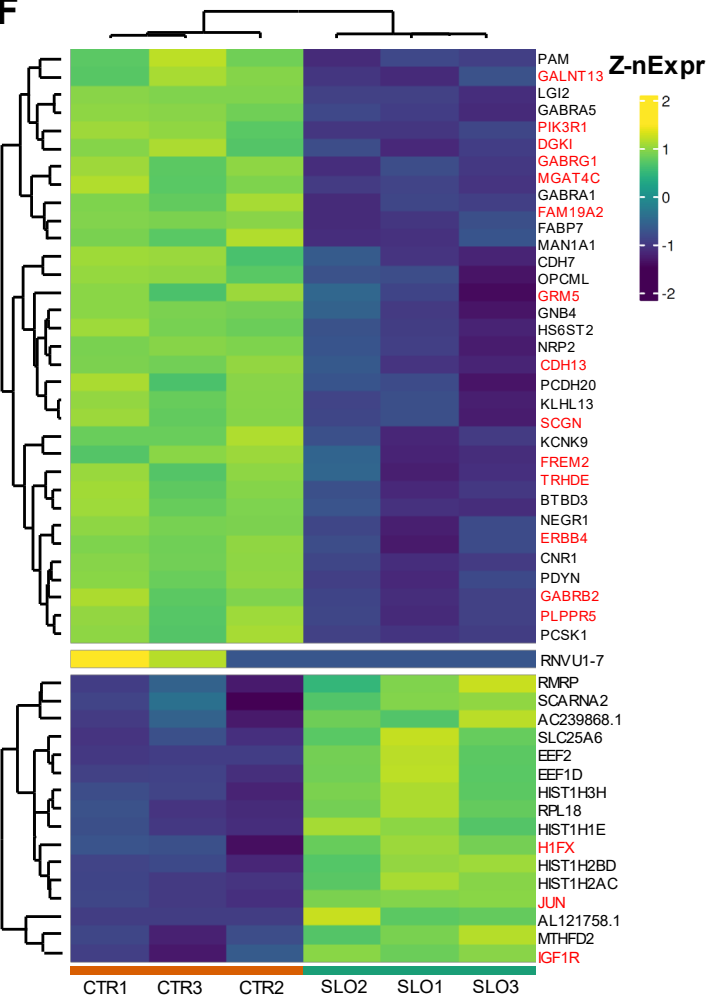

**G**

## Overrepresented pathways in SLO

| Term                                                                                        | Overlap | P-value  | Genes                                                                                            |
|---------------------------------------------------------------------------------------------|---------|----------|--------------------------------------------------------------------------------------------------|
| The effect of progerin on the involved genes in Hutchinson-Gilford Progeria Syndrome WP4320 | 11/37   | 1.49E-05 | HIST1H2AM;HIST1H2AL;HIST2H2AA4;HIST1H3A;HIST2H4B;HIST1H2AI;HIST1H2AD;HIST1H3H;HIST1H3I;HIST2H3D; |
| Histone Modifications WP2369                                                                | 11/67   | 1.58E-04 | HIST1H2AB                                                                                        |

## Underrepresented pathways in SLO

| Term                                                              | Overlap | P-value  | Genes                                          |
|-------------------------------------------------------------------|---------|----------|------------------------------------------------|
| GABA receptor Signaling WP4159                                    | 6/31    | 4.10E-07 | GABRB2;GABRA1;GABRA5;GABRA4;SLC6A11;GABRG1     |
| Phosphodiesterases in neuronal function WP4222                    | 6/53    | 1.08E-05 | PDE1C;PPP1R1B;PDE3A;ADCY2;CHRFAM7A;PDE7B       |
| Nicotine Activity on Dopaminergic Neurons WP1602                  | 4/21    | 4.16E-05 | KCNK9;CHRNA5;PPP1R1B;ADCY2                     |
| Serotonin and anxiety WP3947                                      | 3/17    | 5.20E-04 | GABRA1;HTR2C;HTR2A                             |
| GPCRs, Class A Rhodopsin-like WP455                               | 8/257   | 0.003257 | MC4R;CHRM5;NPY1R;HTR2C;PRLHR;CXCR4;OPRK1;HTR2A |
| Monoamine GPCRs WP58                                              | 3/33    | 0.003733 | CHRM5;HTR2C;HTR2A                              |
| PPAR signaling pathway WP3942                                     | 4/67    | 0.003794 | FABP3;CD36;SLC27A2;RXRG                        |
| Sudden Infant Death Syndrome (SIDS) Susceptibility Pathways WP706 | 6/158   | 0.004051 | GABRA1;MAOA;CHRFA7A;HTR2A;PPARGC1A;PPARGC1B    |



# Figure 6

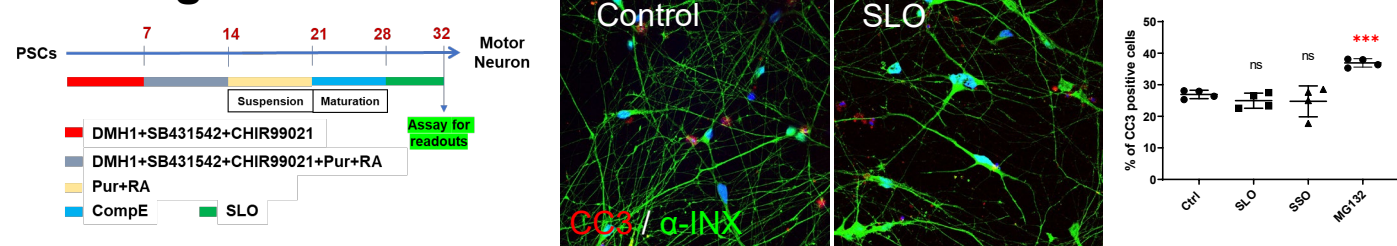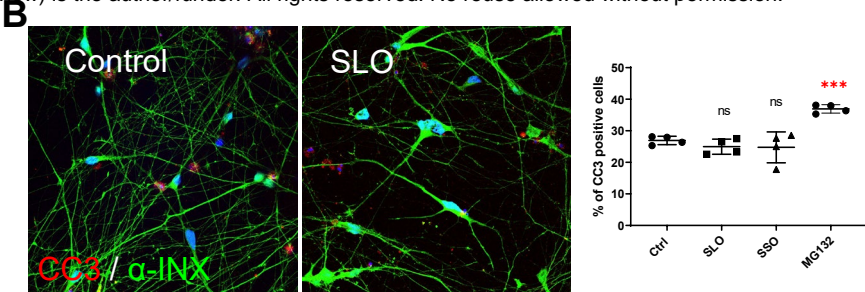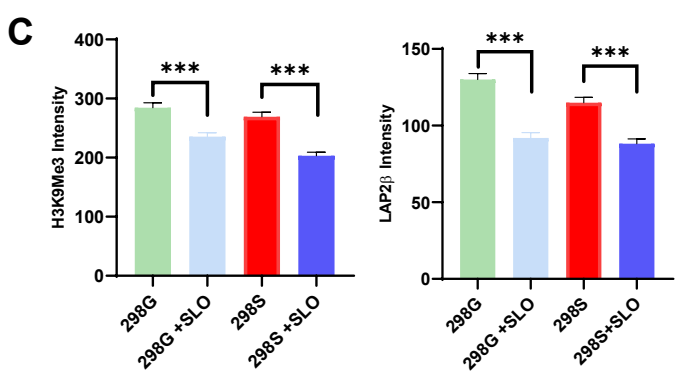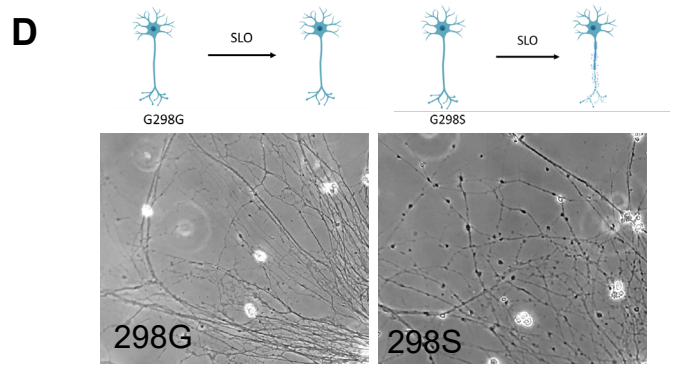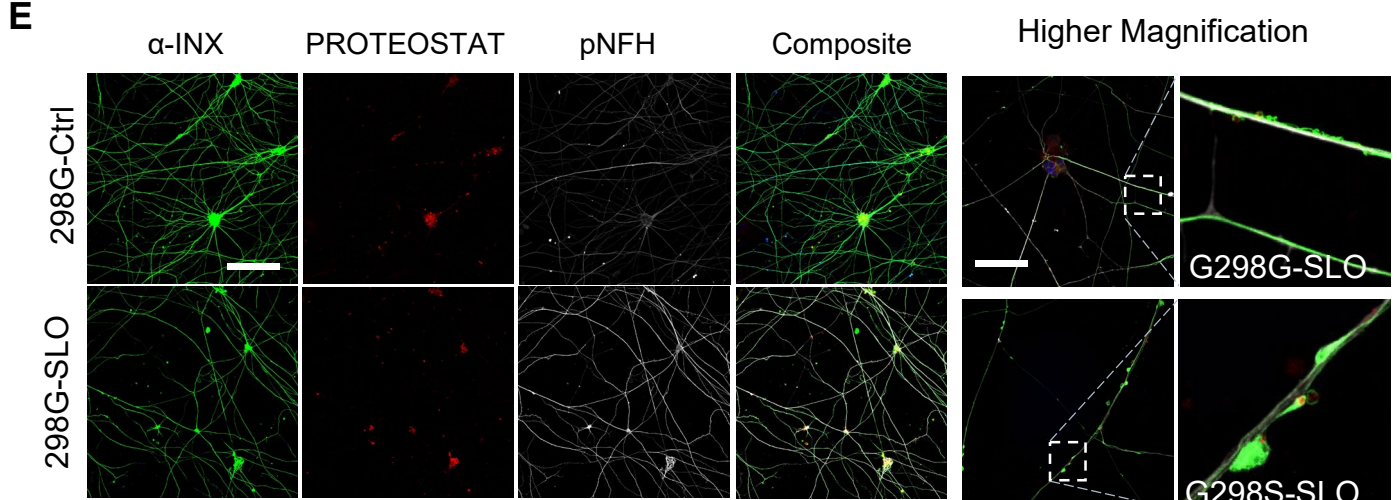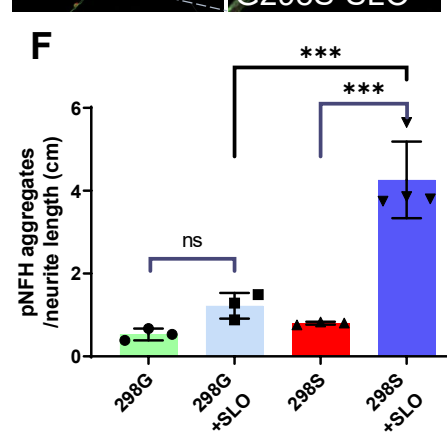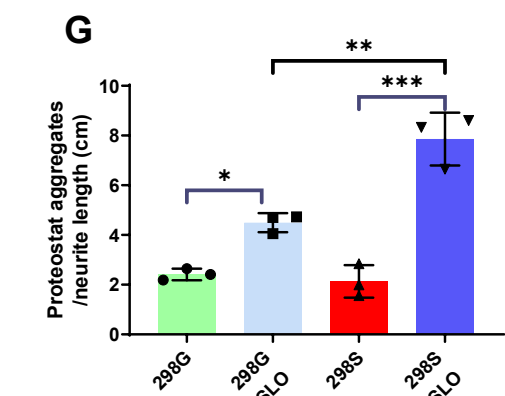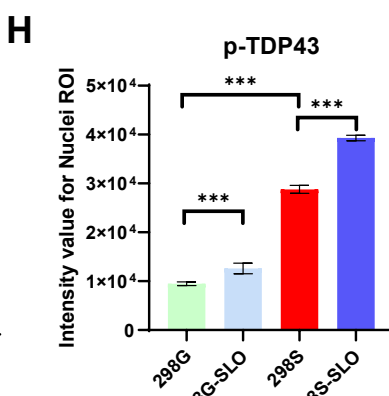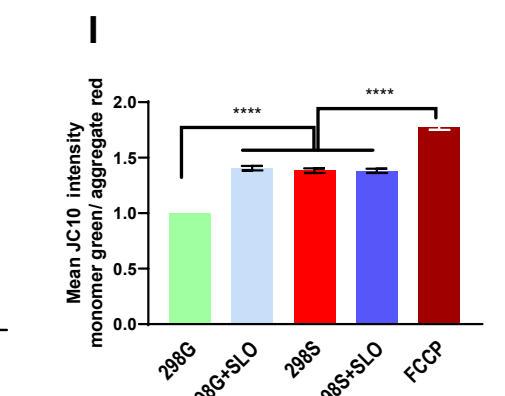

# Figure 7

**A**

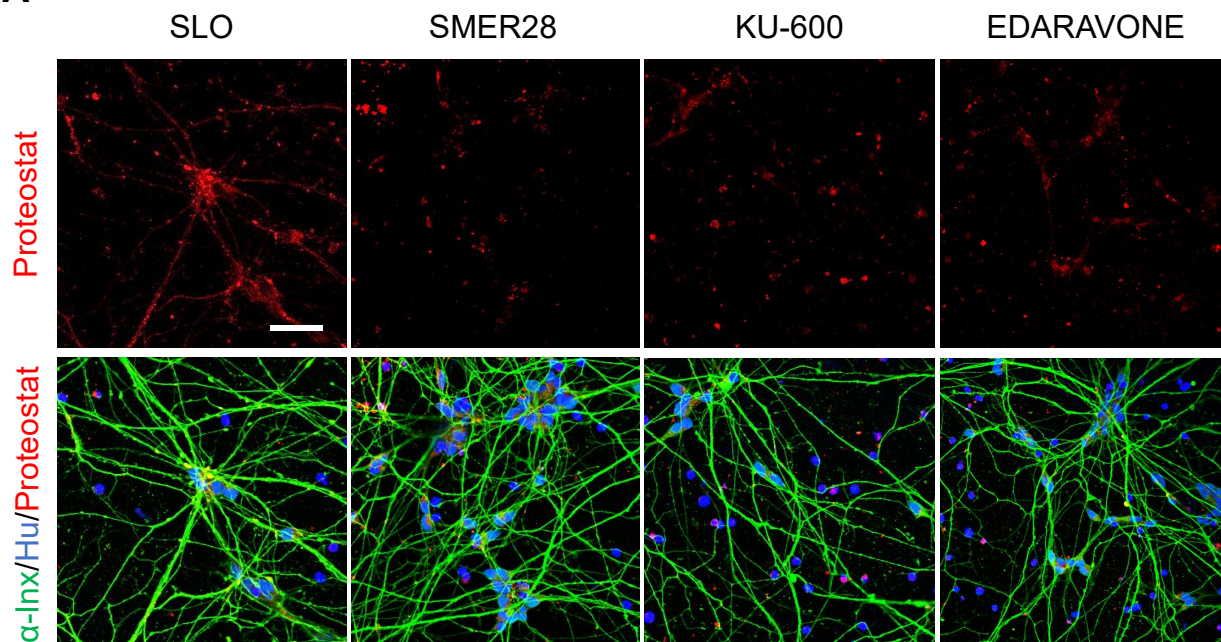

**B**

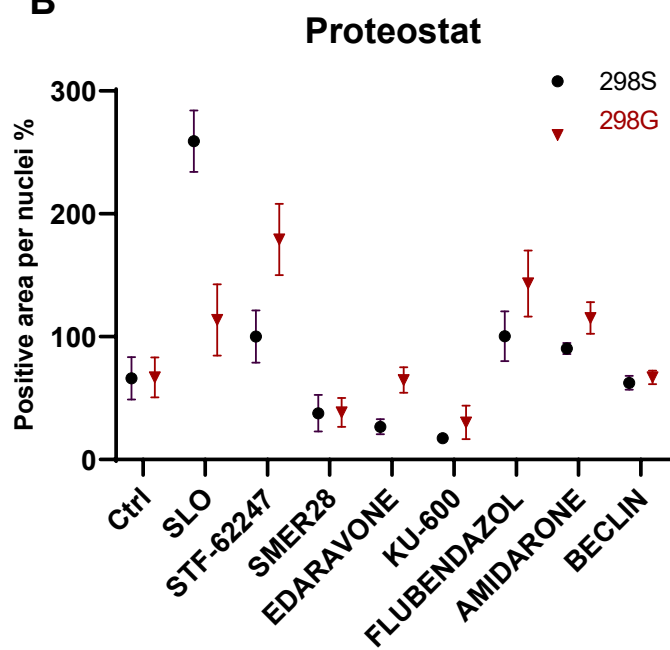

**C**

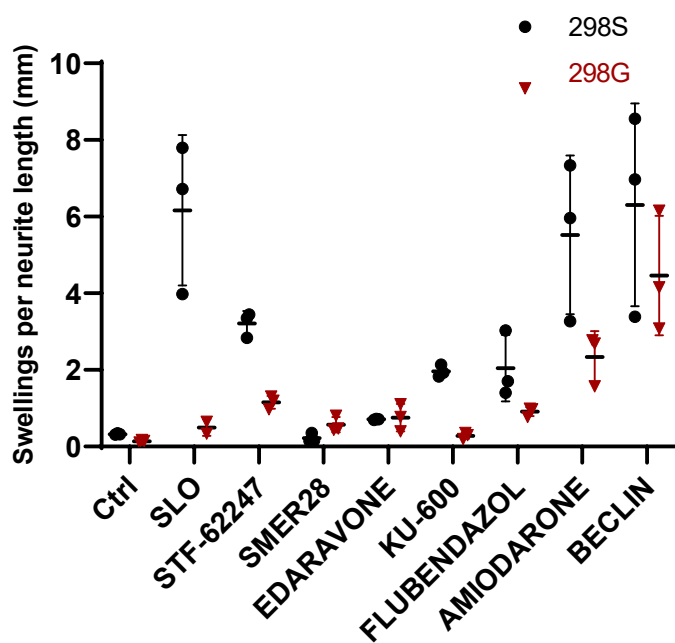

Source: https://biorxiv.org/content/10.1101/2021.07.11.451956v1.full.pdf
