# Supplementary material for: Chemically Induced Senescence in Human Stem Cell-Derived Neurons Promotes Phenotypic Presentation of Neurodegeneration
Source: bioRxiv or medRxiv preprint supplement (doi:10.1101/2021.07.11.451956), 2021-07-12
Supplement: Supplementary file [file media-1.pdf]

1 **Supplementary Information**

2 **Chemically Induced Senescence in Human Stem Cell-Derived Neurons Promotes**  
3 **Phenotypic Presentation of Neurodegeneration**

4 Ali Fathi<sup>1,6</sup>, Sakthikumar Mathivanan<sup>1,6</sup>, Linghai Kong<sup>1</sup>, Andrew J Petersen<sup>1</sup>, Cole R. K. Harder<sup>1</sup>,  
5 Jasper Block<sup>1</sup>, Julia Marie Miller<sup>1</sup>, Anita Bhattacharyya<sup>1,2</sup>, Daifeng Wang<sup>1</sup>, Su-Chun Zhang<sup>1,3,4,5\*</sup>

6 1- Waisman Center, School of Medicine and Public Health, University of Wisconsin-Madison, Madison  
7 WI 53705, USA

8 2- Department of Cell and Regenerative Biology, School of Medicine and Public Health, University of  
9 Wisconsin-Madison, Madison WI 53705, USA

10 3- Department of Neuroscience, School of Medicine and Public Health, University of Wisconsin,  
11 Madison, WI 53705, USA

12 4- Department of Neurology, School of Medicine and Public Health, University of Wisconsin, Madison,  
13 WI 53705, USA

14 5- Program in Neuroscience & Behavioral Disorders, Duke-NUS Medical School, Singapore,  
15 Singapore

16 6- These authors contribute equally.

17 \*Correspondence: suchun.zhang@wisc.edu

18

19

20

21

22

23

24

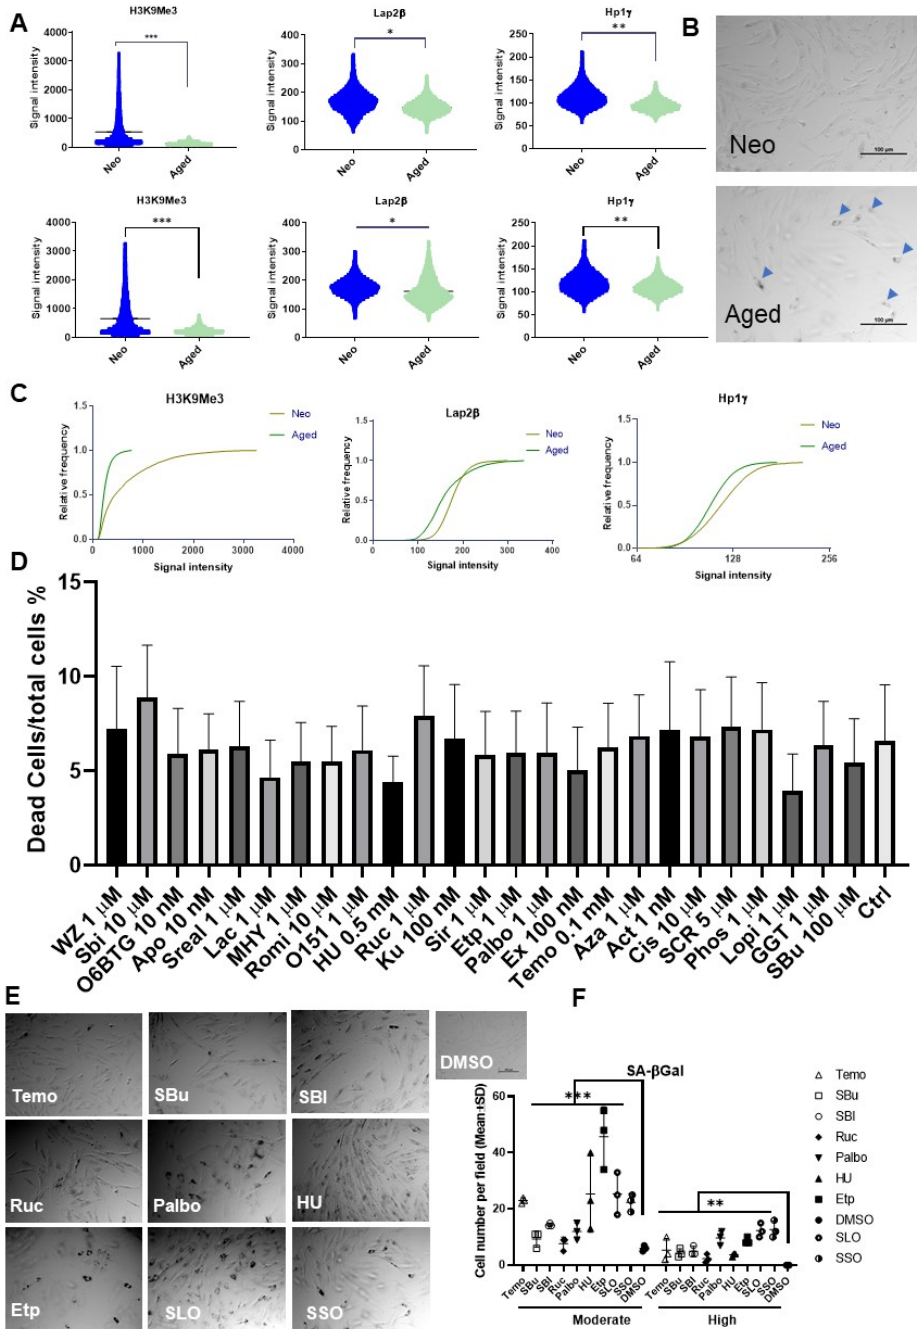

25

26 **Figure S1. Related to figure 1**, Individual values for H3K9Me3, Lap2β and HP1γ expression in  
 27 both male (upper panel) and female (lower panel) fibroblast cells (A) and phase contrast images  
 28 of senescence associated β-Galactosidase staining (arrowheads) for both neonatal and aged  
 29 (female 62 years old) fibroblasts (B). Frequency distribution analysis of results from high content  
 30 imaging for H3K9Me3, Lap2β and HP1γ proteins in female neonatal and aged (62 years old)  
 31 fibroblasts (C). Cell toxicity assay for small molecules in the used concentration in actual  
 32 experiment compared to the DMSO control in neonatal fibroblasts (D). Phase contrast images of  
 33 senescence associated β-Galactosidase staining for top seven molecules that induced  
 34 senescence and SLO and SSO combinations with neonatal fibroblasts (E), and quantification

35 results for percentage of positive cells (all numbers across replicates pooled) and divided to highly  
 36 expression and moderate expression classes based on intensity of staining (F). (\*:  $p < 0.05$ , \*\*:  $p < 0.01$ , \*\*\*:  $p < 0.001$  one-way ANOVA with Dunnett's multiple comparison test). Scale bar =  
 37 100um.  
 38

39

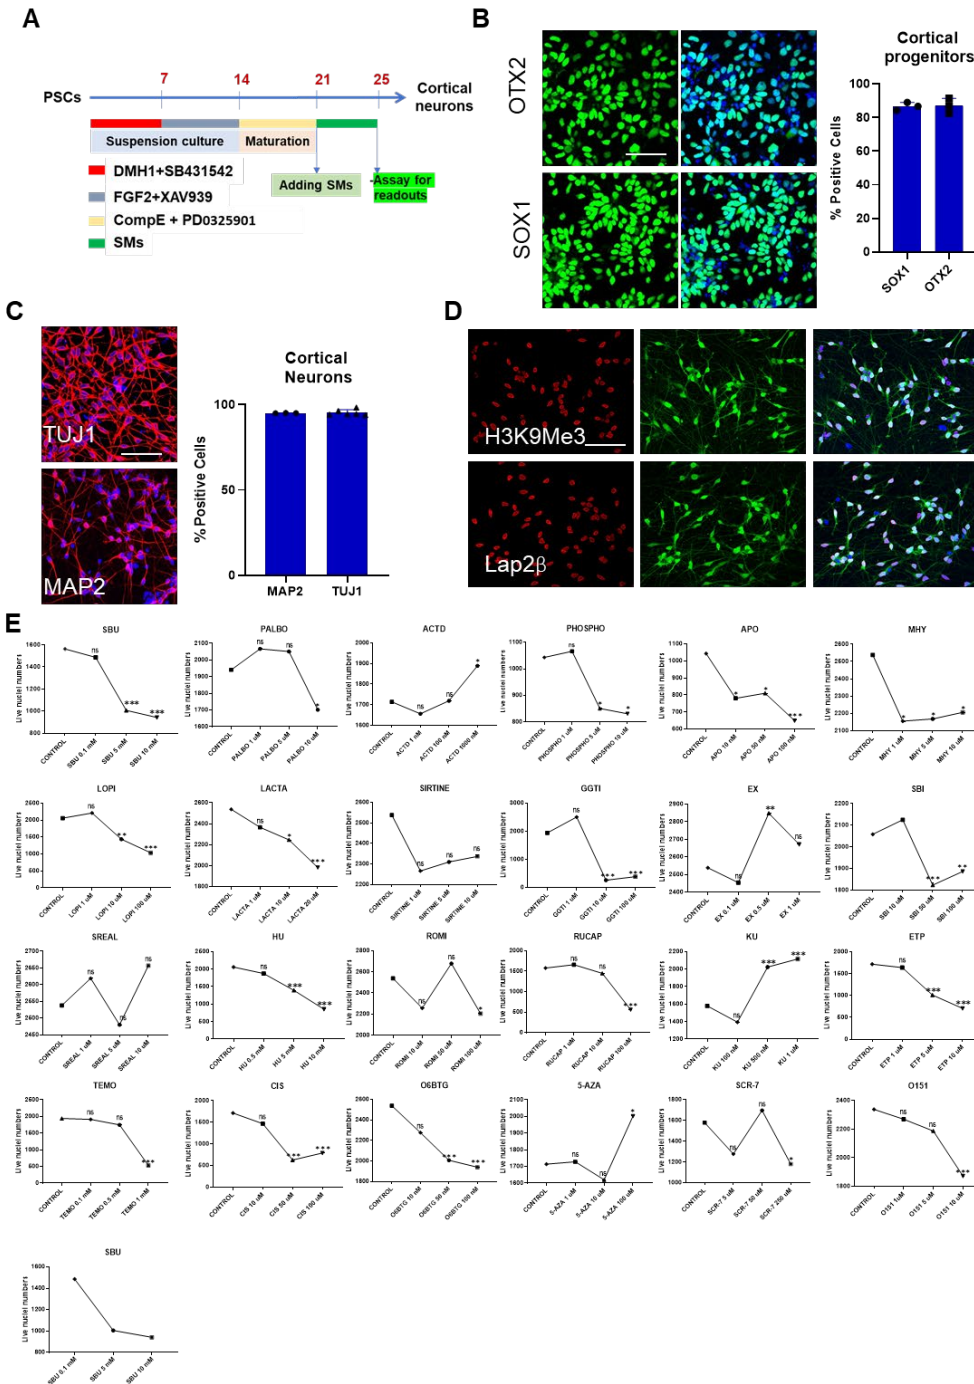

40

41 **Figure S2. related to figure 3- differentiation of cortical neurons from H9-GFP ESCs and**  
 42 **characterization for expression of neuronal markers.**

43 Differentiation protocol used for generating cortical neurons from H9-GFP stem cells (A).  
 44 Immunostaining images for SOX1 and OTX2 in day-14 cortical progenitors and quantification for  
 45 proportion of positive cells Scale bar=50  $\mu\text{m}$  (B). Representative immunostaining images for day-  
 46 21 cortical neurons expressing TUJ1 (TUBB3) and MAP2 proteins in red and nucleus stained with  
 47 Hoechst in blue (Scale bar=100  $\mu\text{m}$ ) and quantification for percentage of positive neurons (C).  
 48 Immunostaining images for H3K9Me3 and Lap2 $\beta$  proteins in day-21 GFP labeled cortical  
 49 neurons, Scale bar=100  $\mu\text{m}$  (D). Cell toxicity assay for different doses of 25 small molecules with  
 50 cortical neurons (E). (ns: not significant, \*:  $p < 0.05$ , \*\*:  $p < 0.01$ , \*\*\*:  $p < 0.001$  one-way ANOVA with  
 51 Dunnett's multiple comparison test).

52

53

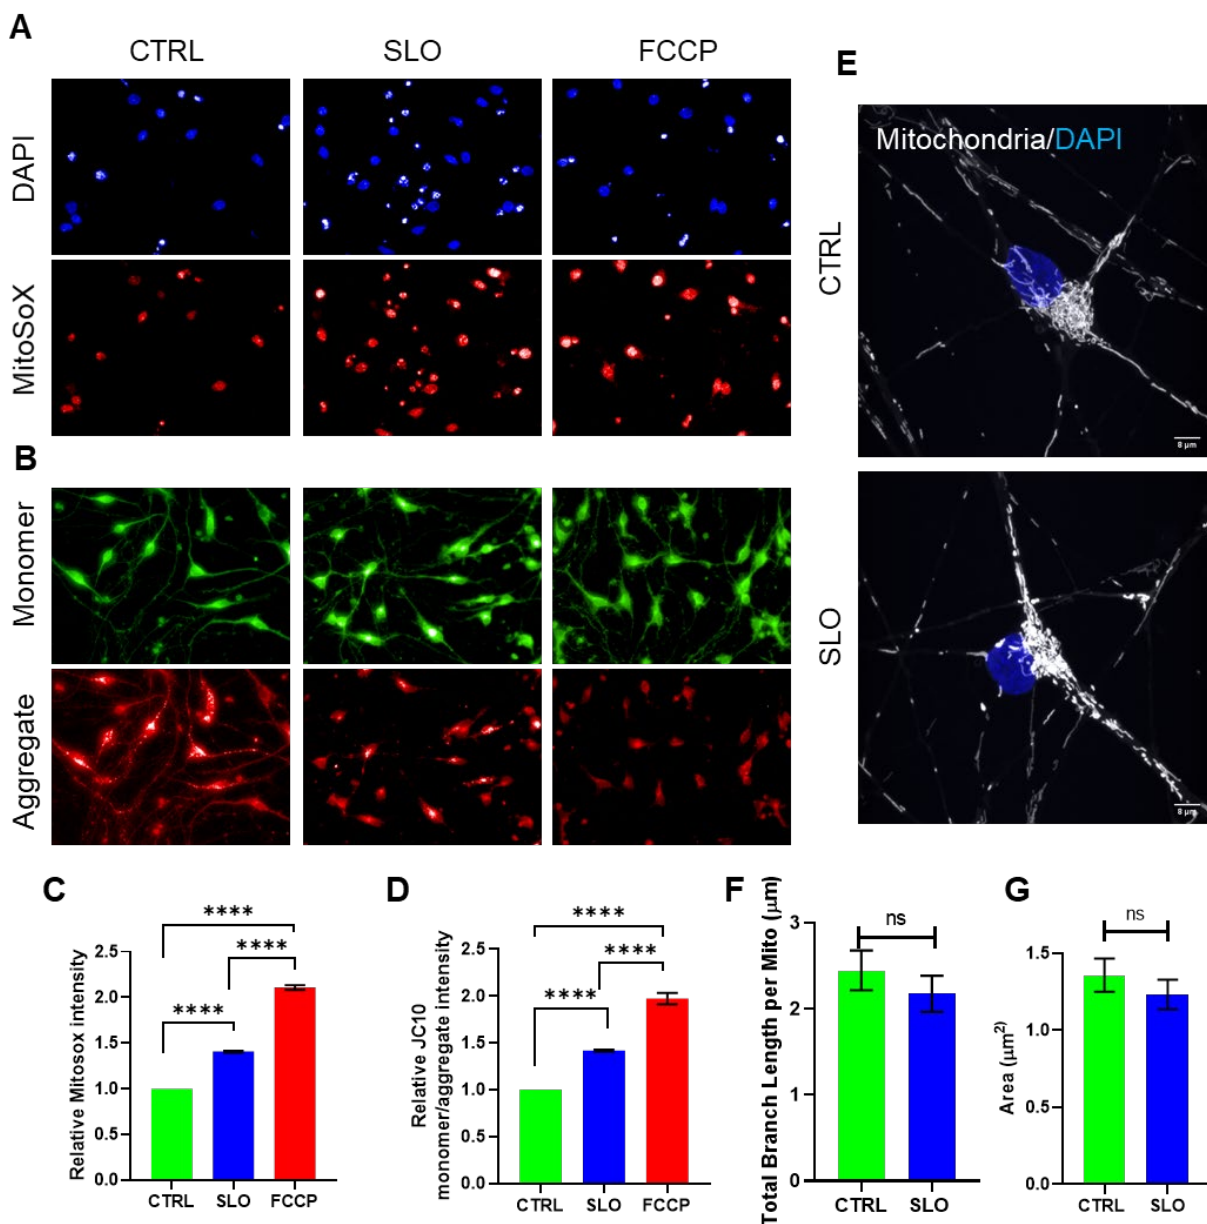

54

55 **Figure S3. MitoSoX and Mitochondrial membrane potential in SLO treated cortical neurons.**  
56 Representative images of cortical neurons at day 25 for MitoSoX staining (A) and JC-10  
57 fluorescence (Top- Monomer (green), Bottom- Aggregate (red) from Control, SLO and FCCP  
58 treated cortical neurons Scale bar= 50 $\mu$ m (B). Statistical analysis of relative MitoSoX intensity  
59 from Control, SLO and FCCP treated neurons (C). Statistical analysis of relative JC10 Monomer  
60 to Aggregate intensity from Control, SLO and FCCP treated neurons (Low monomer to aggregate  
61 ratio means high mitochondrial membrane potential, high monomer to aggregate ratio means low  
62 mitochondrial membrane potential) (D). Represented images of Mitotracker stained mitochondria  
63 in cortical neurons (E) and quantification results for mitochondrial length (F) and mitochondrial  
64 area in SLO treated neurons versus control neurons (G). Data was quantified using 15,000 cells  
65 per group from two independent experiments. Statistical analysis was performed using One-way  
66 ANOVA, Tukey post-hoc test (\*\*\*\*-  $P < 0.001$ ).

67

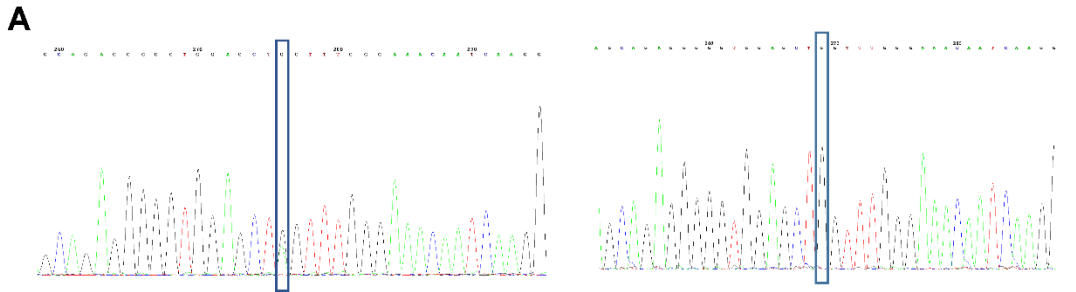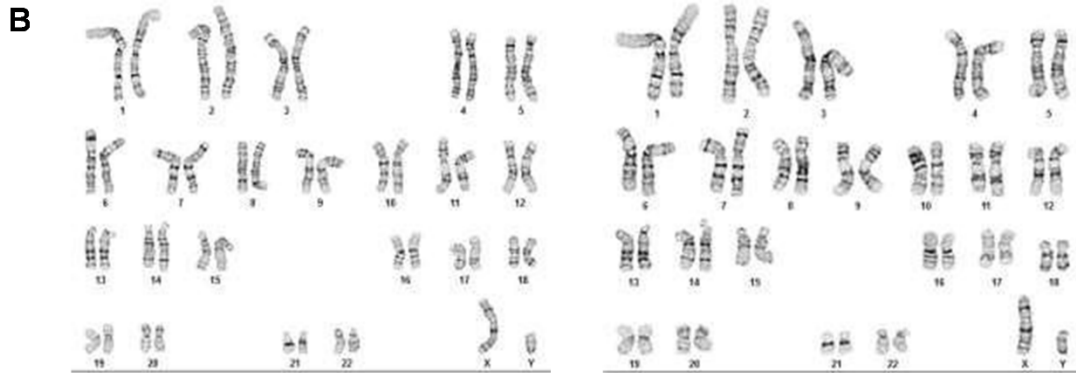

**TDP43 G298S iPSC#13**

**Total Counted: 20**

**Total Analyzed: 8**

**Total Karyogrammed: 4**

**Band Resolution: 400 - 500**

**TDP43 G298G iPSC#19**

**Total Counted: 20**

**Total Analyzed: 8**

**Total Karyogrammed: 4**

**Band Resolution: 475 - 550**

**C**

| STR Locus  | STR Genotype Repeat #                                                                                          | STR Genotype | STR Locus  | STR Genotype Repeat #                                                                                         | STR Genotype |
|------------|----------------------------------------------------------------------------------------------------------------|--------------|------------|---------------------------------------------------------------------------------------------------------------|--------------|
| FGA        | 16-18,18,2,19,19,2,20,20,2,21,21,2,22, 22, 2, 23, 23,2, 24, 24,2, 25, 25,2, 26-30, 31,2, 43,2, 44,2,45,2, 46,2 | 19,21        | FGA        | 16-18,18,2,19,19,2,20,20,2,21,21,2,22, 22,2, 23, 23,2, 24, 24,2, 25, 25,2, 26 30, 31,2, 43,2, 44,2,45,2, 46,2 | 19,21        |
| TPOX       | 6-13                                                                                                           | 9,11         | TPOX       | 6-13                                                                                                          | 9,11         |
| D8S1179    | 7-18                                                                                                           | 10,12        | D8S1179    | 7-18                                                                                                          | 10,12        |
| vWA        | 10-22                                                                                                          | 17,17        | vWA        | 10-22                                                                                                         | 17,17        |
| Amelogenin | X,Y                                                                                                            | X,Y          | Amelogenin | X,Y                                                                                                           | X,Y          |
| Penta D    | 2,2, 3,2, 5, 7-17                                                                                              | 11,12        | Penta D    | 2,2, 3,2, 5, 7-17                                                                                             | 11,12        |
| CSF1PO     | 6-15                                                                                                           | 10,13        | CSF1PO     | 6-15                                                                                                          | 10,13        |
| D16S539    | 5, 8-15                                                                                                        | 9,11         | D16S539    | 5, 8-15                                                                                                       | 9,11         |
| D7S820     | 6-14                                                                                                           | 8,12         | D7S820     | 6-14                                                                                                          | 8,12         |
| D13S317    | 7-15                                                                                                           | 11,12        | D13S317    | 7-15                                                                                                          | 11,12        |
| D5S818     | 7-16                                                                                                           | 11,14        | D5S818     | 7-16                                                                                                          | 11,14        |
| Penta E    | 5-24                                                                                                           | 7,16         | Penta E    | 5-24                                                                                                          | 7,16         |
| D18S51     | 8-10, 10,2, 11-13, 13,2, 14-27                                                                                 | 12,16        | D18S51     | 8-10, 10,2, 11-13, 13,2, 14-27                                                                                | 12,16        |
| D21S11     | 24,24,2,25,25,2,26-28,28,2,29,29,2, 30, 30,2,31, 31,2,32,32,2,33,33,2, 34,34,2,35,35,2,36-38                   | 30,31        | D21S11     | 24,24,2,25,25,2,26-28,28,2,29,29,2, 30, 30,2,31, 31,2,32,32,2,33,33,2, 34,34,2,35,35,2,36-38                  | 30,31        |
| TH01       | 4-9,9,3,10-11,13,3                                                                                             | 6,9,3        | TH01       | 4-9,9,3,10-11,13,3                                                                                            | 6,9,3        |
| D3S1358    | 12-20                                                                                                          | 15,15        | D3S1358    | 12-20                                                                                                         | 15,15        |

68

69 **Figure S4. Related to figure 6- Characterization of TDP43 G298S and TDP43 G298G iPSCs.**

70 Sanger sequencing result for both mutant (left panel) and corrected (right panel) (isogenic control)  
 71 cell lines. Karyotype analysis for mutant (left) and corrected (right) cell lines (B). STR analysis for  
 72 both cell lines were done for selected loci depicted in C.

73

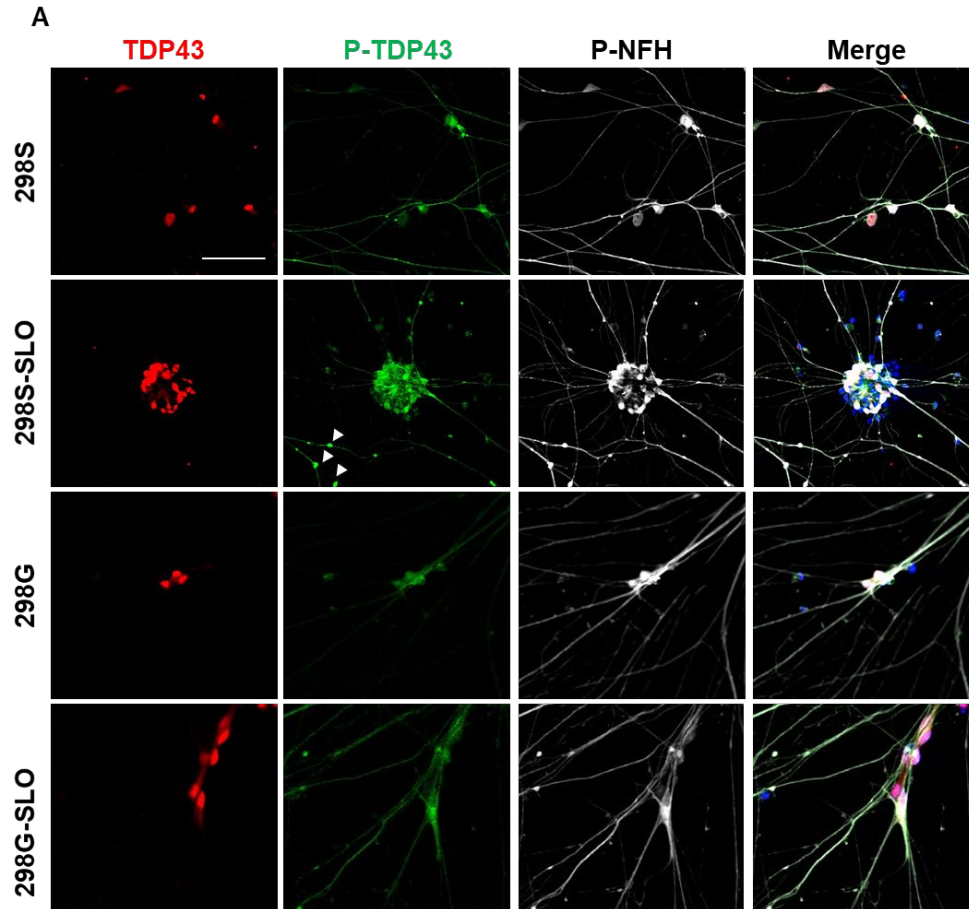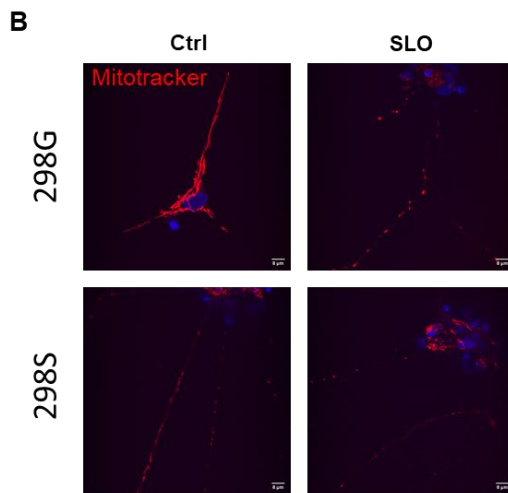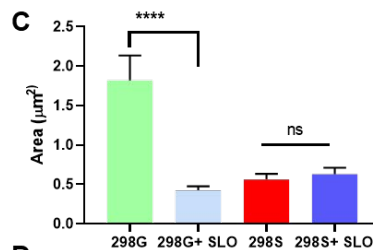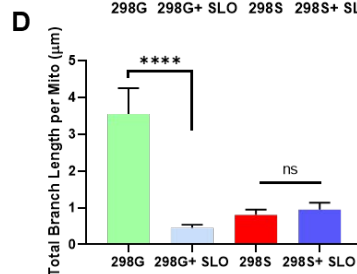

74

75 **Figure S5. Related to Figure 6- ALS MNs treated with SLO molecules shows signs of**  
 76 **neurodegeneration and protein phosphorylation.** Immunostaining images of phosphor-TDP43  
 77 protein following SLO treatment in 298S mutant cells and 298G healthy control cells, arrow heads  
 78 are pointed at p-TDP43 positive neurite swellings in mutant cells (A, for quantification see the  
 79 Figure 6H). (Scale bar=100 µm). MNs stained using Mitotracker red to visualize morphological  
 80 changes in SLO treated cells (B) (Scale bar=8 µm), and graphs of quantified data for mitochondrial

81 area (C) and total branch length for each mitochondria (D). ( \*: p<0.05, \*\*\*: p<0.001 one-way  
 82 ANOVA with Dunnett's multiple comparison test).

83

84

**Table S1: List of the small molecules and their concentration for final screen in neurons.**

| Name                     | Function                     | Working Concentration | Name                          | Function                                          | Working Concentration |
|--------------------------|------------------------------|-----------------------|-------------------------------|---------------------------------------------------|-----------------------|
| <b>WZ4003</b>            | AMPK inhibitor               | 2µM                   | <b>SirReal2</b>               | Sirt2 inhibitor                                   | 1µM                   |
| <b>MHY1485</b>           | mTOR activator               | 2µM                   | <b>Rucaparib</b>              | PARP1 inhibitor                                   | 1µM                   |
| <b>Fumonisin B1</b>      | AKT activators               | 5µM                   | <b>Temozolomide</b>           | DNA alkylation                                    | 100µM                 |
| <b>Sirtinol</b>          | Sirtuin inhibitors           | 5µM                   | <b>Lactacystin</b>            | irreversible proteasome inhibitor                 | 4nM                   |
| <b>SBI-0206965</b>       | Autophagy inhibitor          | 10µM                  | <b>KU-60019</b>               | ATM inhibitor                                     | 100nM                 |
| <b>Romidepsin</b>        | HDAC1,2 inhibitor            | 10pM                  | <b>5-AZA-20-DEOXYCYTIDINE</b> | DNA methyltransferase inhibitor                   | 1µM                   |
| <b>Etoposid</b>          | Topo II inhibitor            | 2µM                   | <b>Actinomycin D</b>          | inhibiting DNA-primed RNA synthesis               | 10nM                  |
| <b>Lomeguatrib-O6BTG</b> | MGMT inhibitor               | 10nM                  | <b>Cisplatin</b>              | Topo I,II inhibitor                               | 10µM                  |
| <b>O151</b>              | DNA Glycosylase-1 inhibitor  | 1µM                   | <b>SCR-7</b>                  | Ligase V inhibitor                                | 5µM                   |
| <b>Palbociclib</b>       | CDK4/6 inhibitor             | 1µM                   | <b>Phosphoramidon</b>         | metalloendopeptidase inhibitor                    | 1µM                   |
| <b>Apo866</b>            | NAD biosynthesis inhibitor   | 10nM                  | <b>Lopinavir</b>              | HIV protease inhibitor                            | 1µM                   |
| <b>Hydroxyurea</b>       | DNA synthesis stress inducer | 500µM                 | <b>GGTI298</b>                | geranylgeranyltransferase I (GGTase I) inhibitor. | 1µM                   |
| <b>EX-527</b>            | Sirt1 inhibitor              | 100nM                 | <b>Sodium Butyrate</b>        | histone deacetylase inhibitor I, II               | 100µM                 |
| <b>SMER28</b>            | Autophagy activator          | 1µM                   | <b>Edaravone</b>              | Radical scavenger                                 | 1µM                   |
| <b>Tat-Beclin</b>        | Autophagy activator          | 100nM                 | <b>Amiodarone</b>             | K <sup>+</sup> channel blocker                    | 5µM                   |
| <b>STF-62247</b>         | Autophagy activator          | 1µM                   | <b>Flubendazole</b>           | Autophagy activator                               | 1µM                   |

85

86
